# Supplementary material for: International Variation in Lung Cancer Mortality Rates and Trends among Women
Source: Oxford University Press journal article supplement (doi:10.1158/1055-9965.epi-13-1220), 2014-05-17
Supplement: 10559965epi131220-sup-122939_2_supp_2345508_n15bgt.docx [file 10559965epi131220-sup-122939_2_supp_2345508_n15bgt.docx]

**Supplement**

**Supplementary Figure S1.** Trends in lung cancer mortality among women aged 30–49, 1985–2011, age-standardized rate (world)

**Supplementary Figure S2.** Trends in lung cancer mortality among women aged 50–74, 1985–2011, age-standardized rate (world)

**Supplementary Figure S3.** Trends in lung cancer mortality among women aged 30–74, 1985–2011, age-standardized rate (world)

**Supplementary Figure S4.** Lung cancer mortality rates in 2006–2010 among females aged 30–74. Age-standardized rate (world).

**Supplementary Figure S5.** Trends in lung cancer mortality rates among women aged 30–74 for select areas, 1950–2011. Age-standardized rate (world), three-year moving averages.

**Supplementary Table S1.** Trends in lung cancer mortality rates among females age 30–74

**
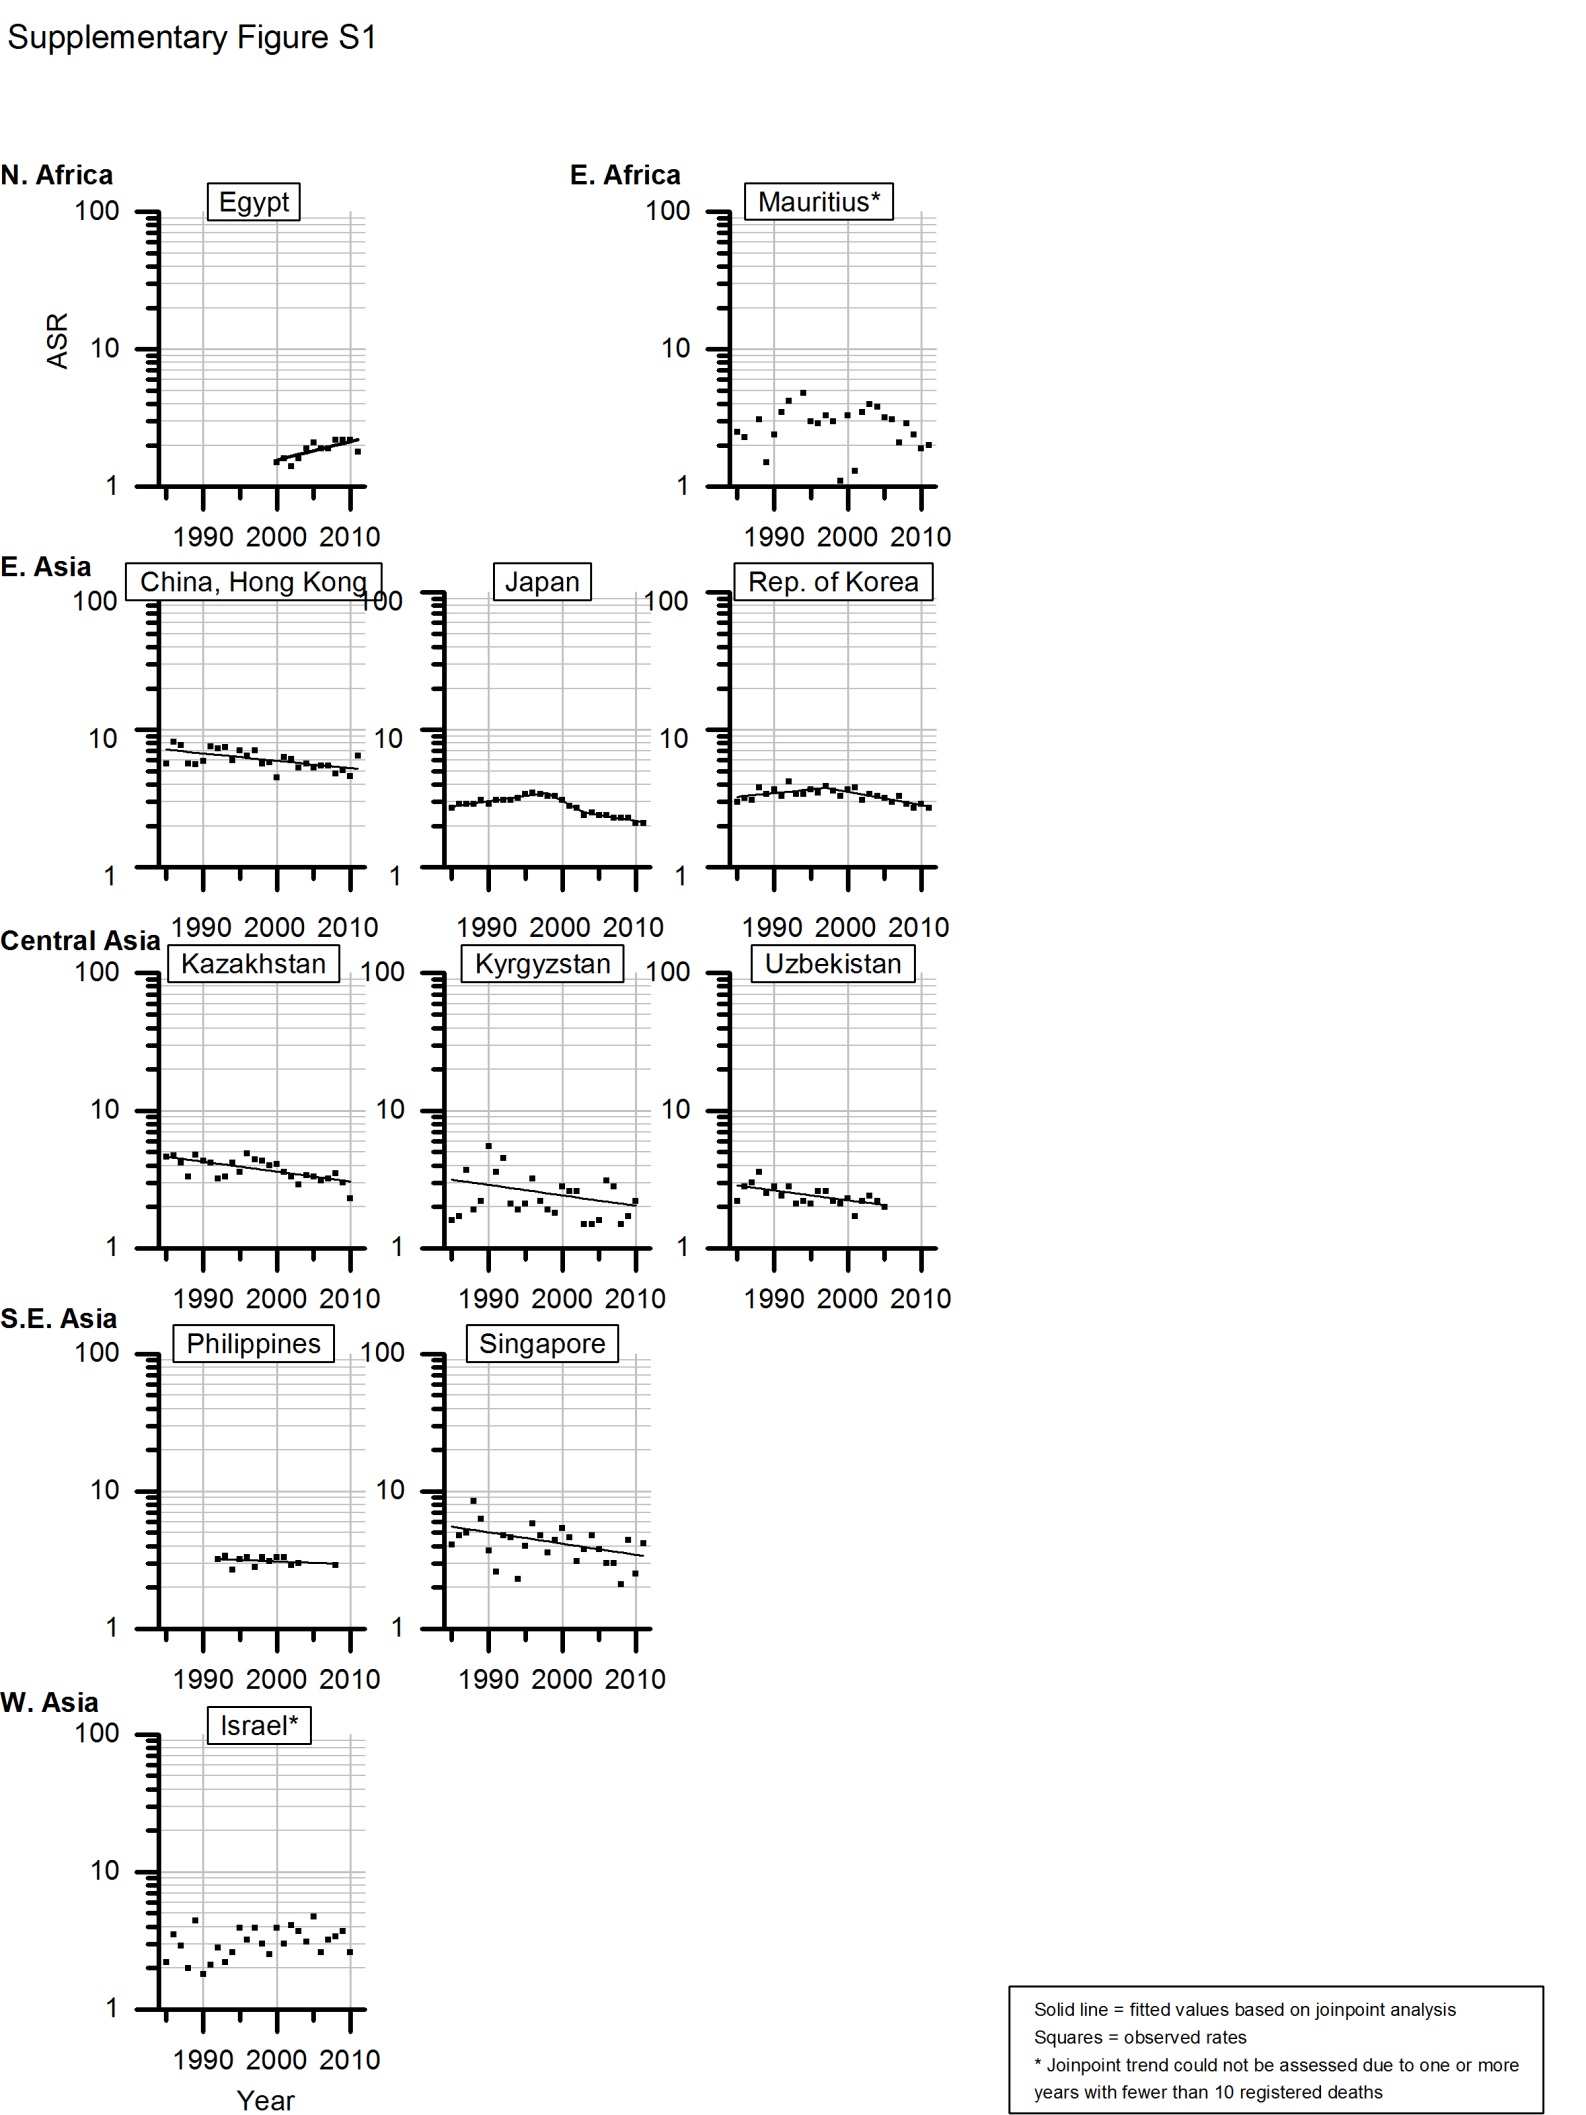
**

**
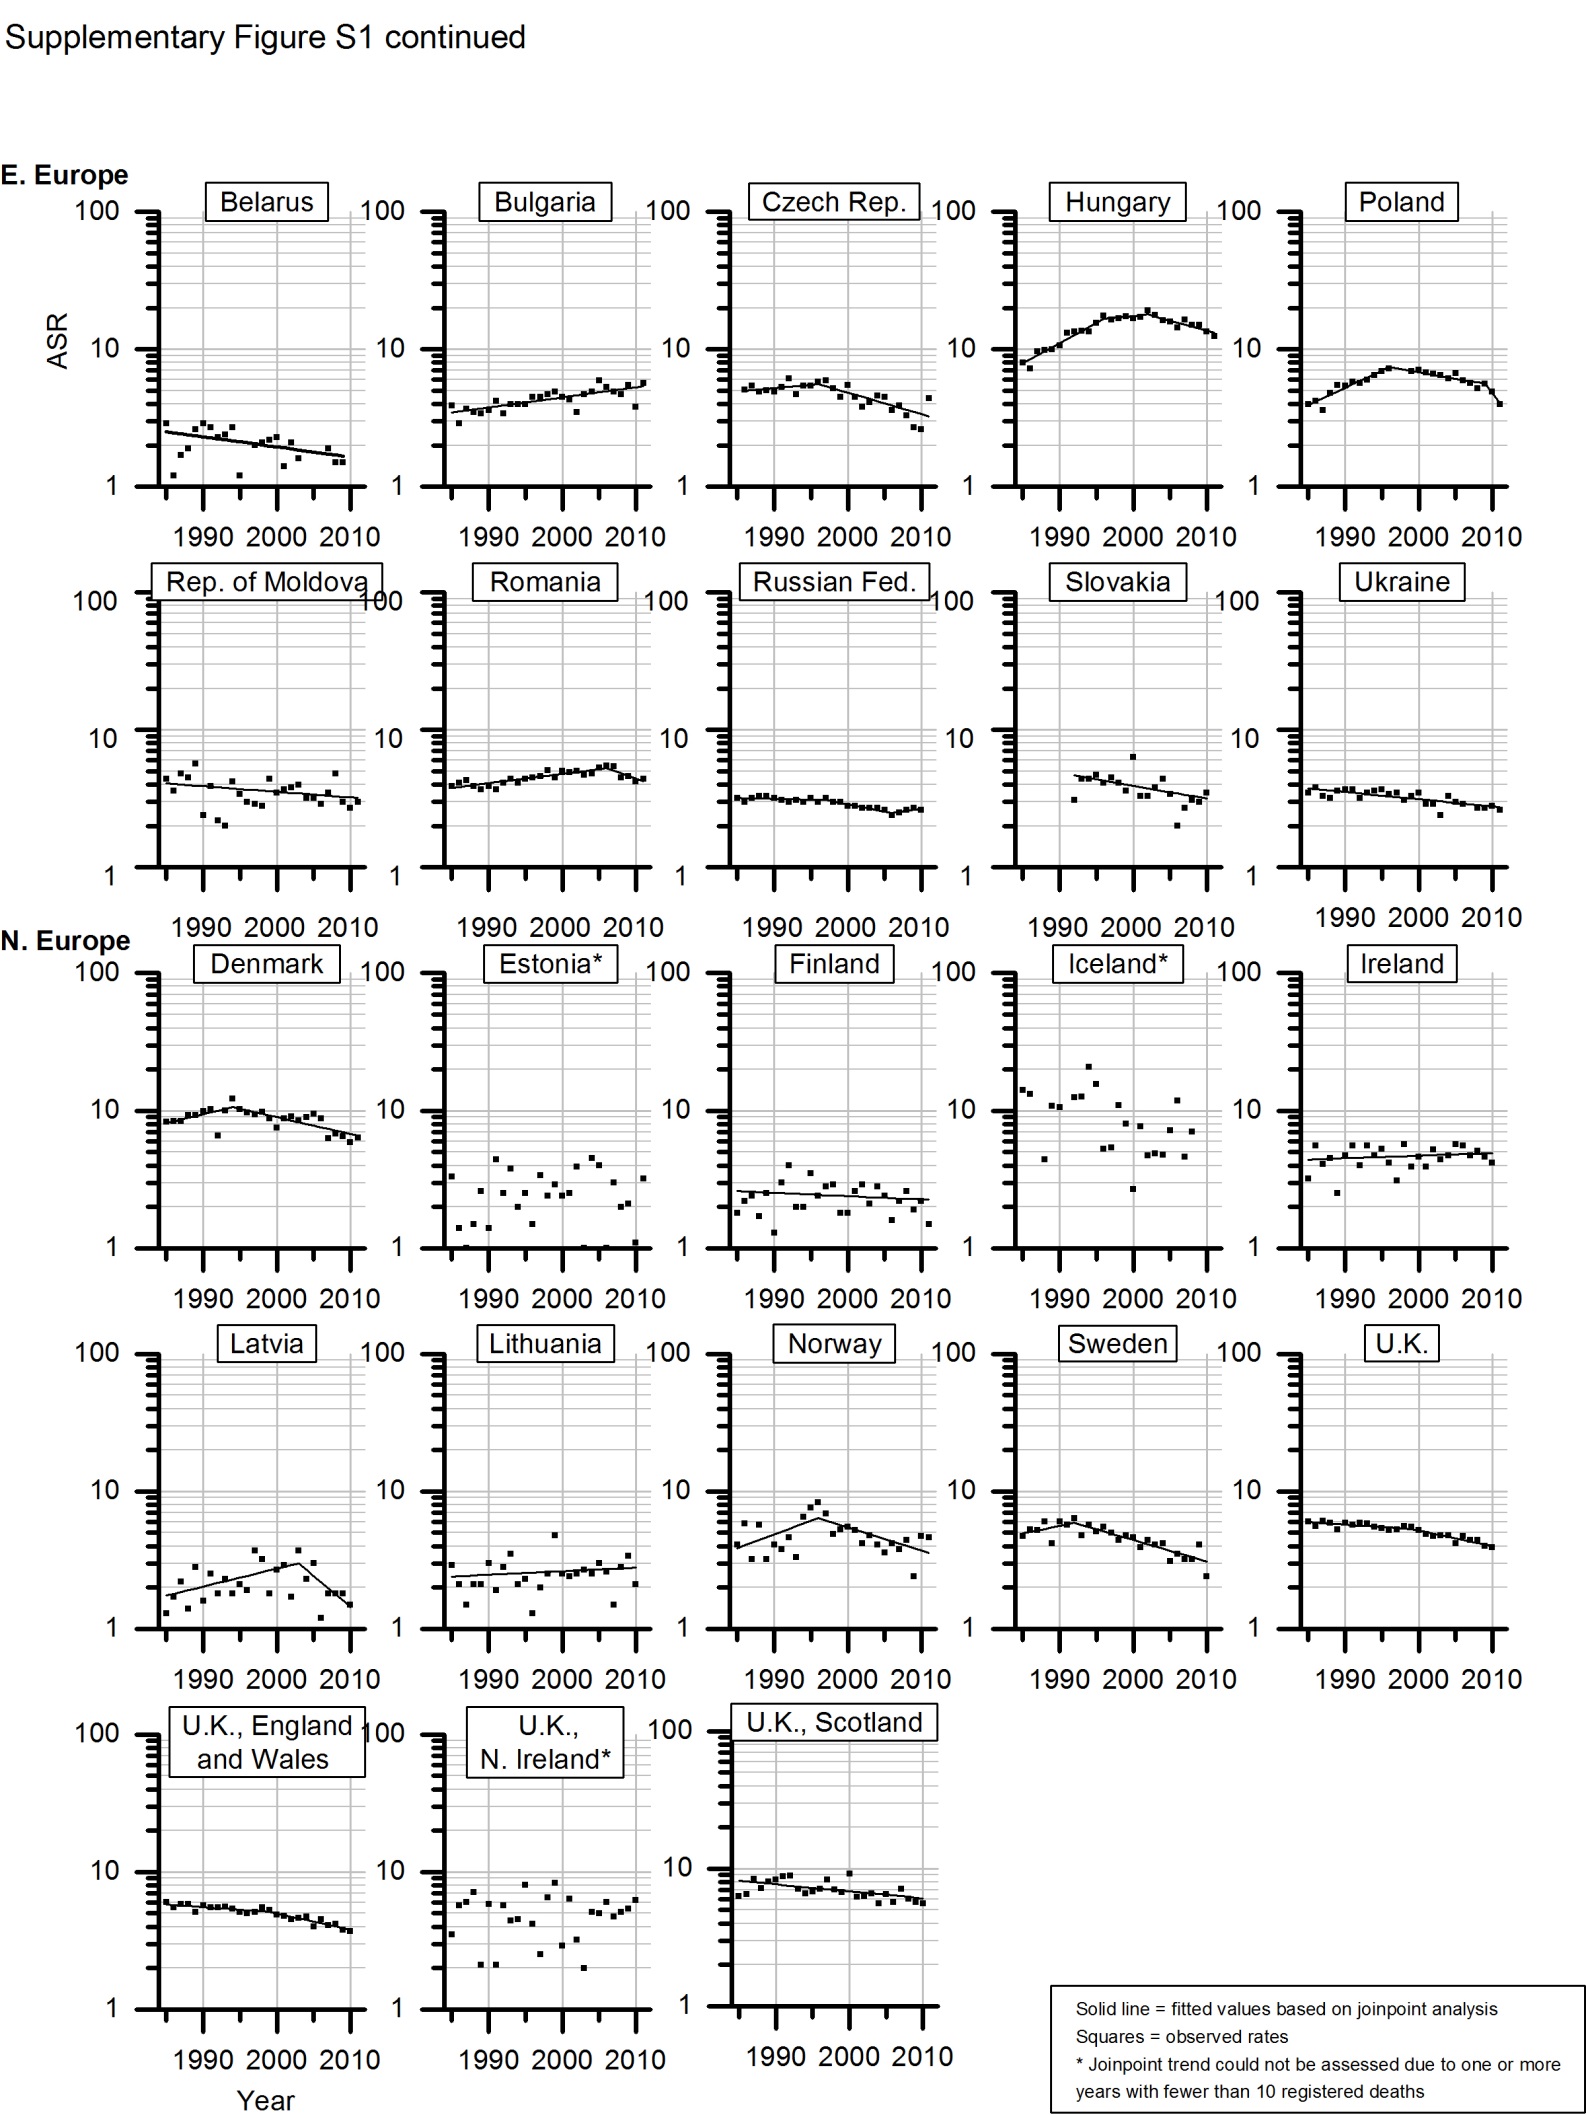
**

**
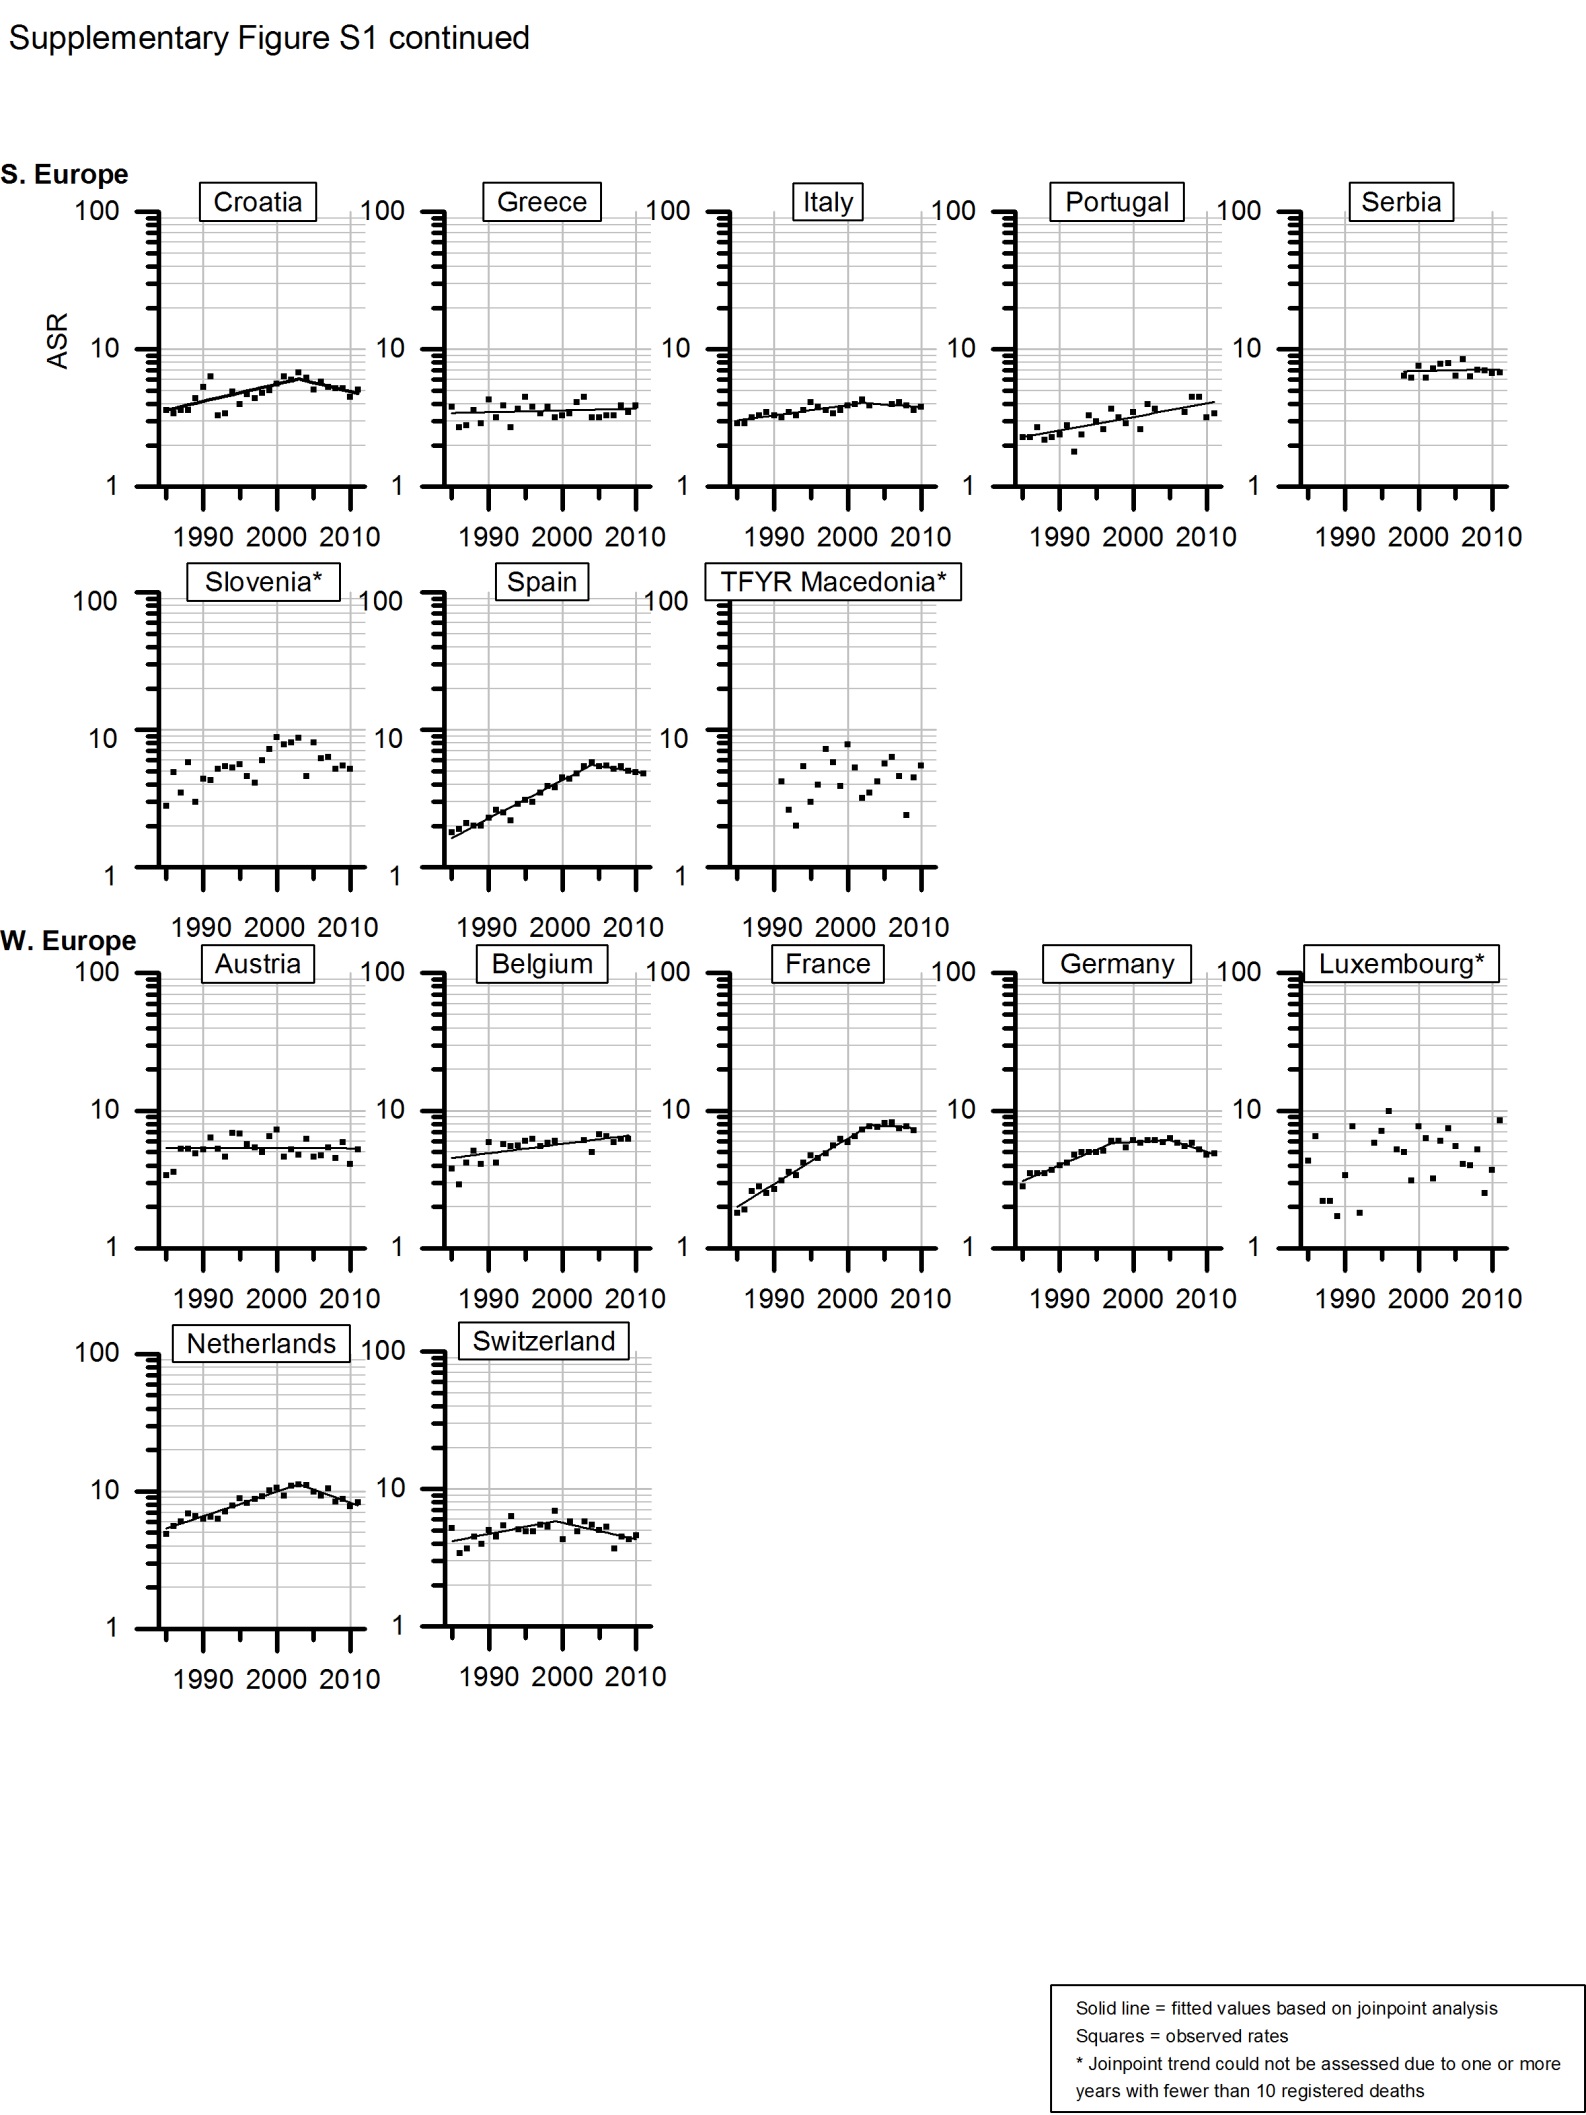
**

**
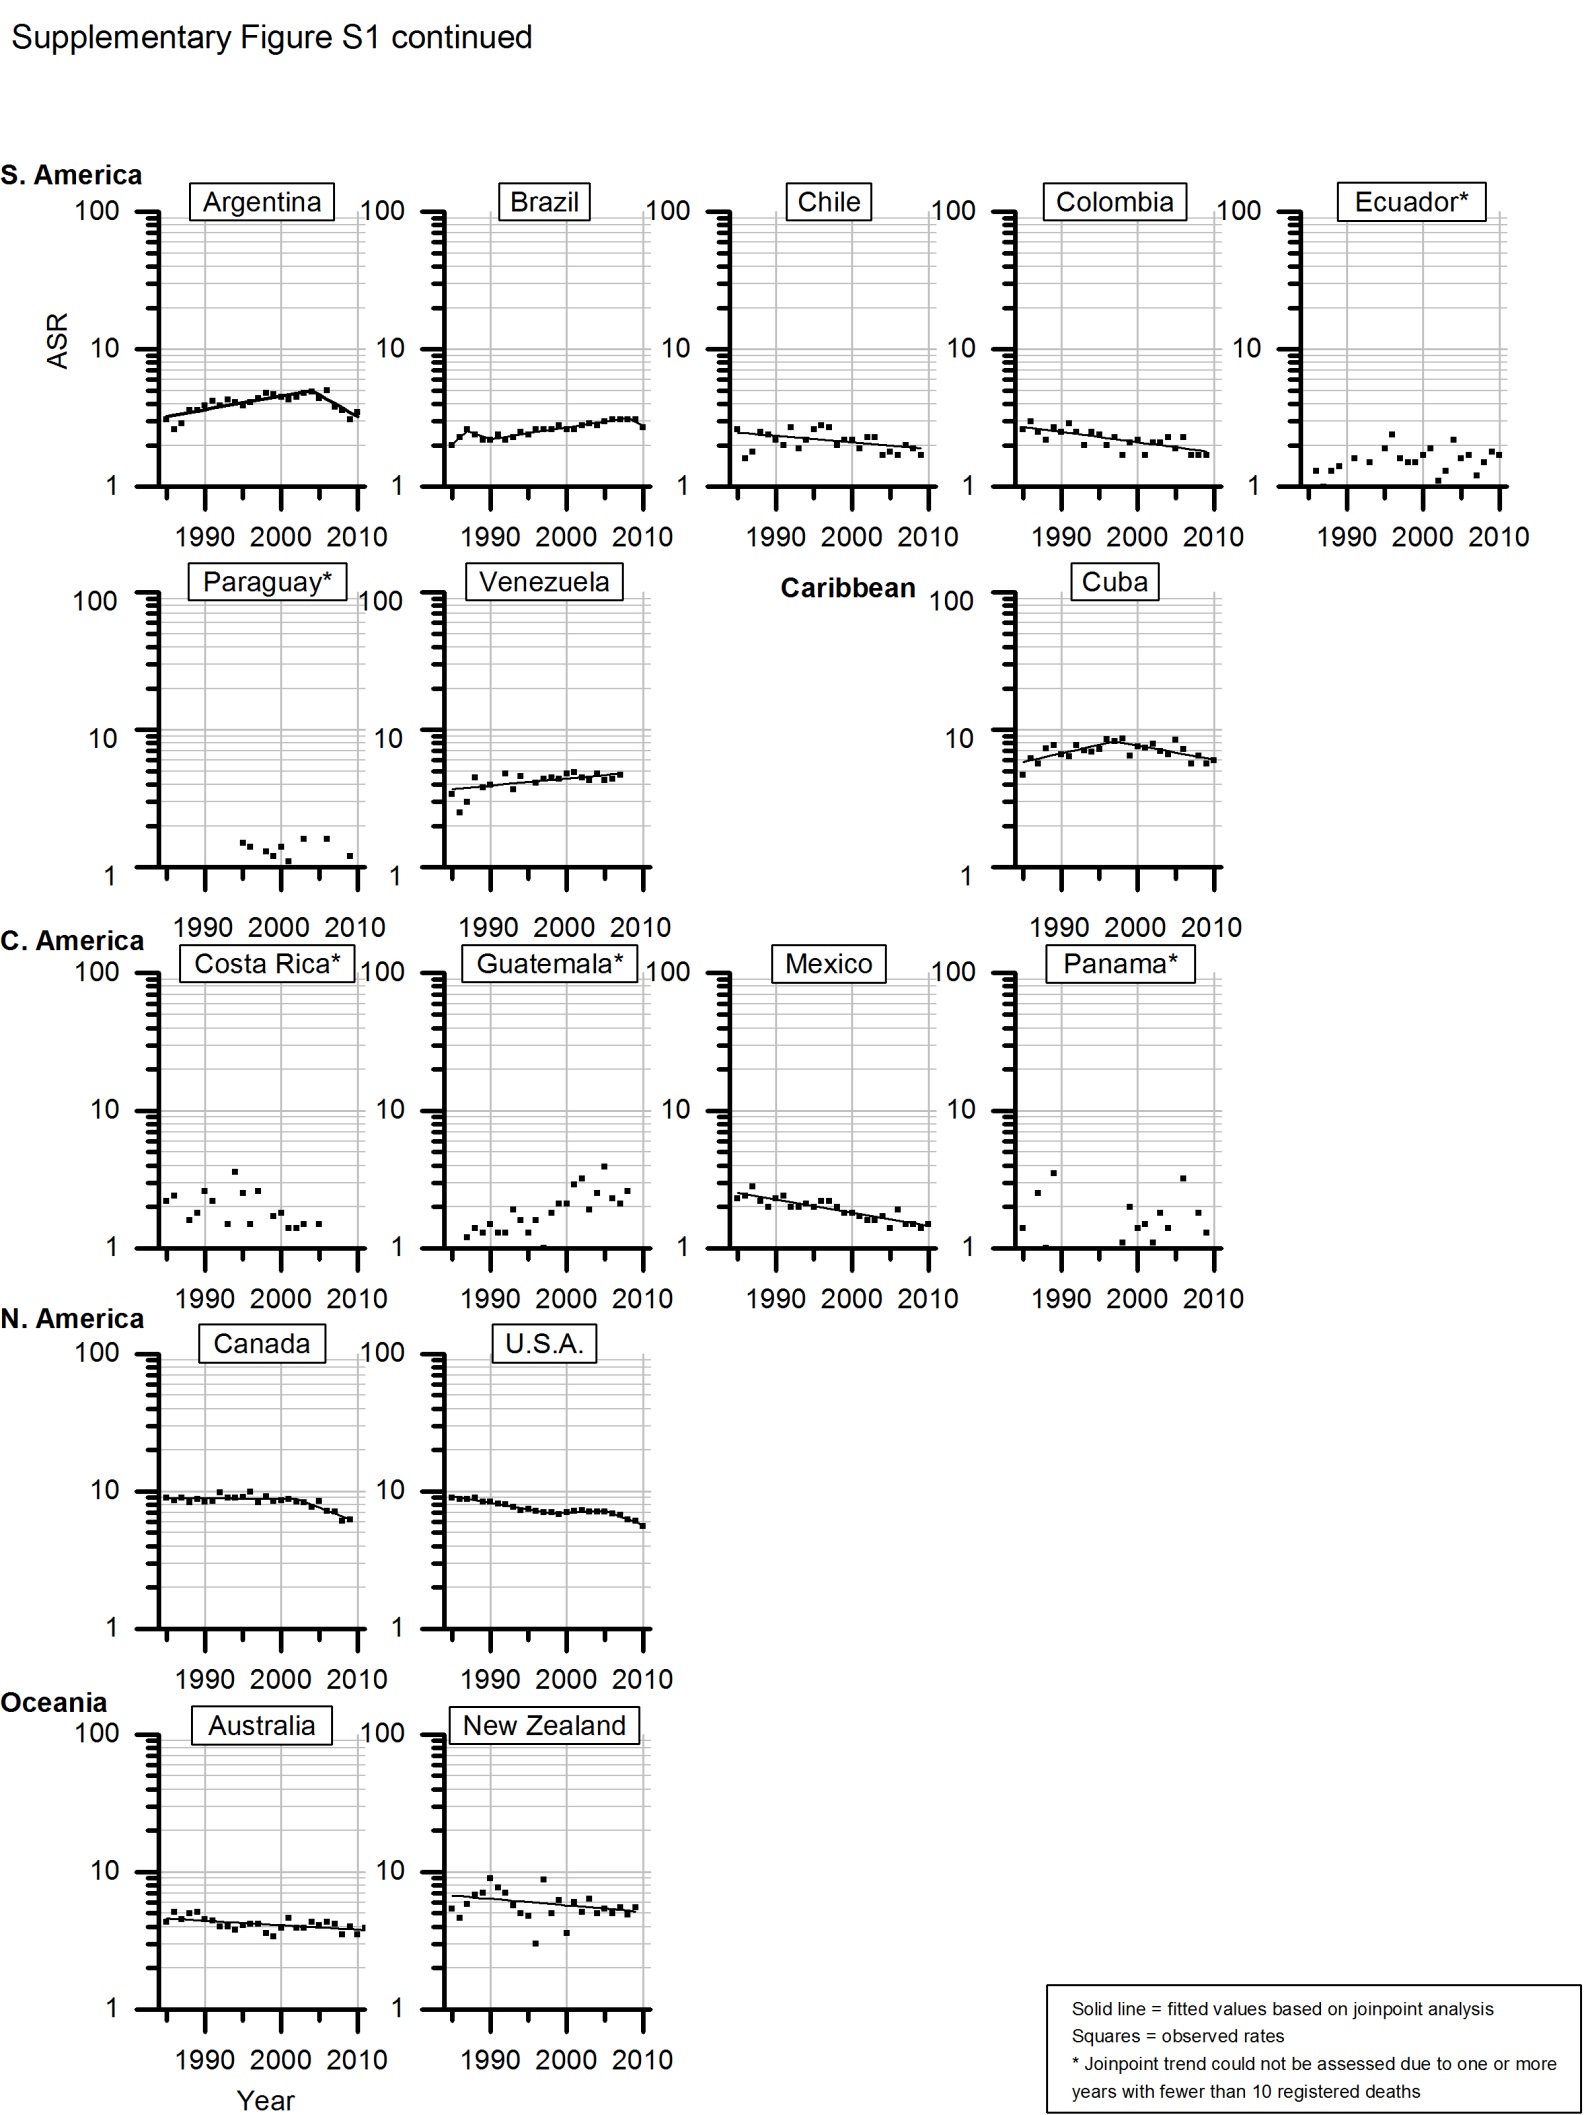
**

**
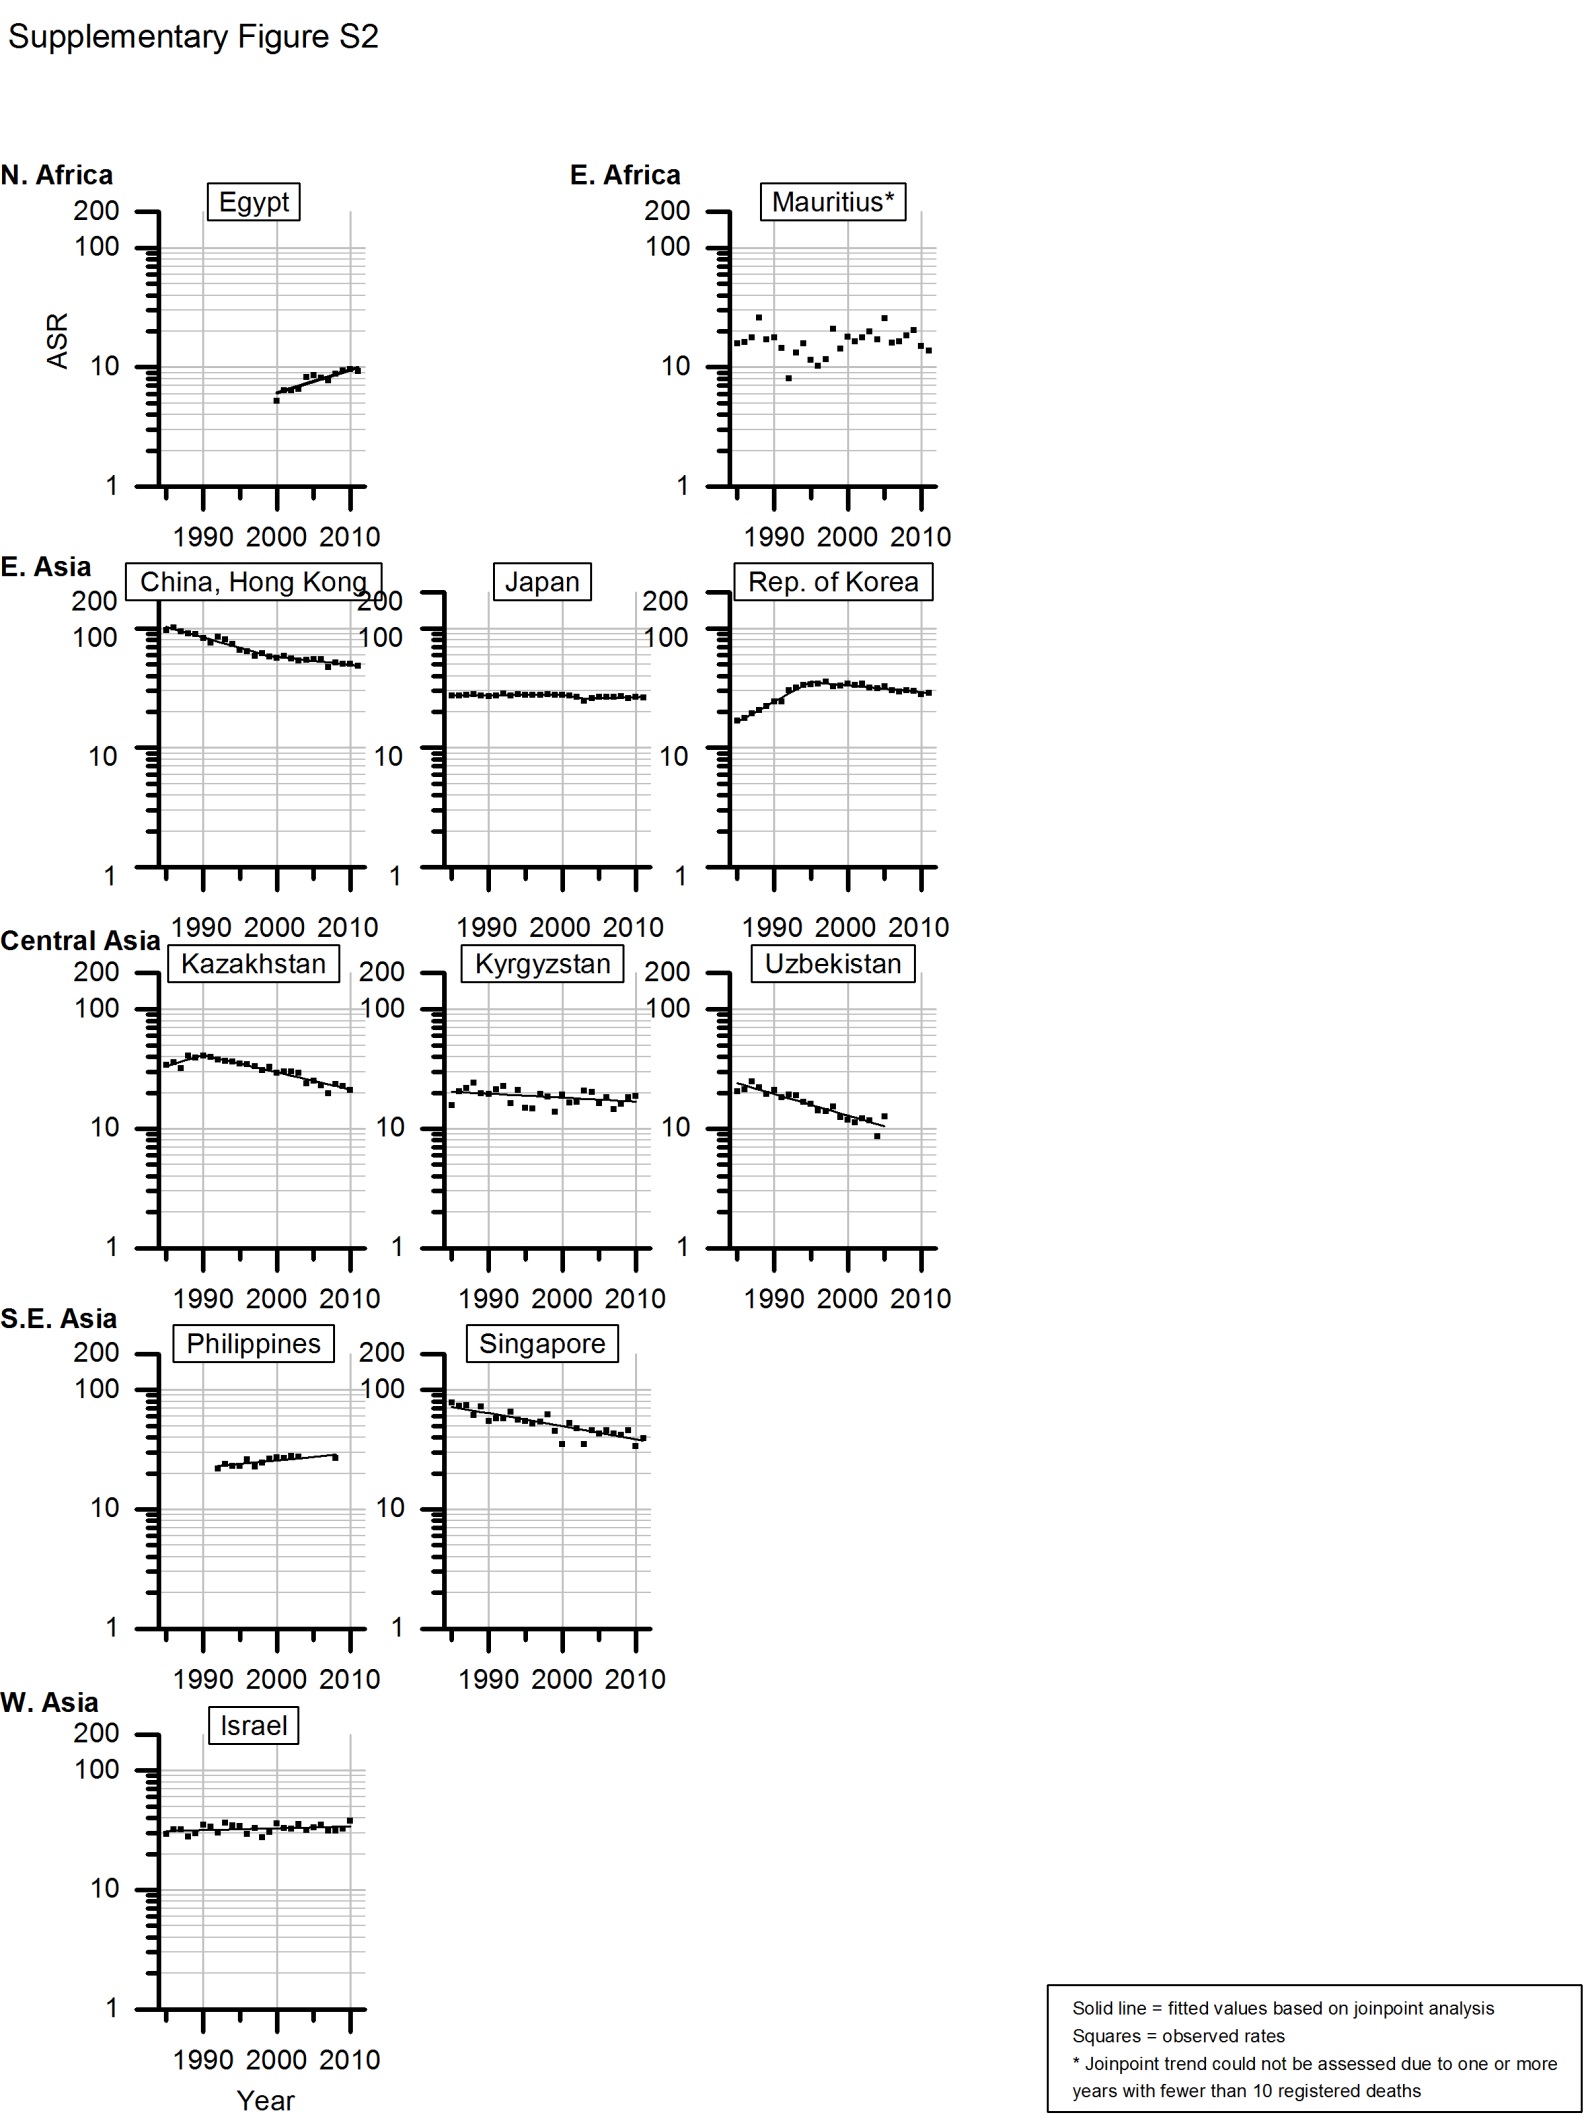
**

**
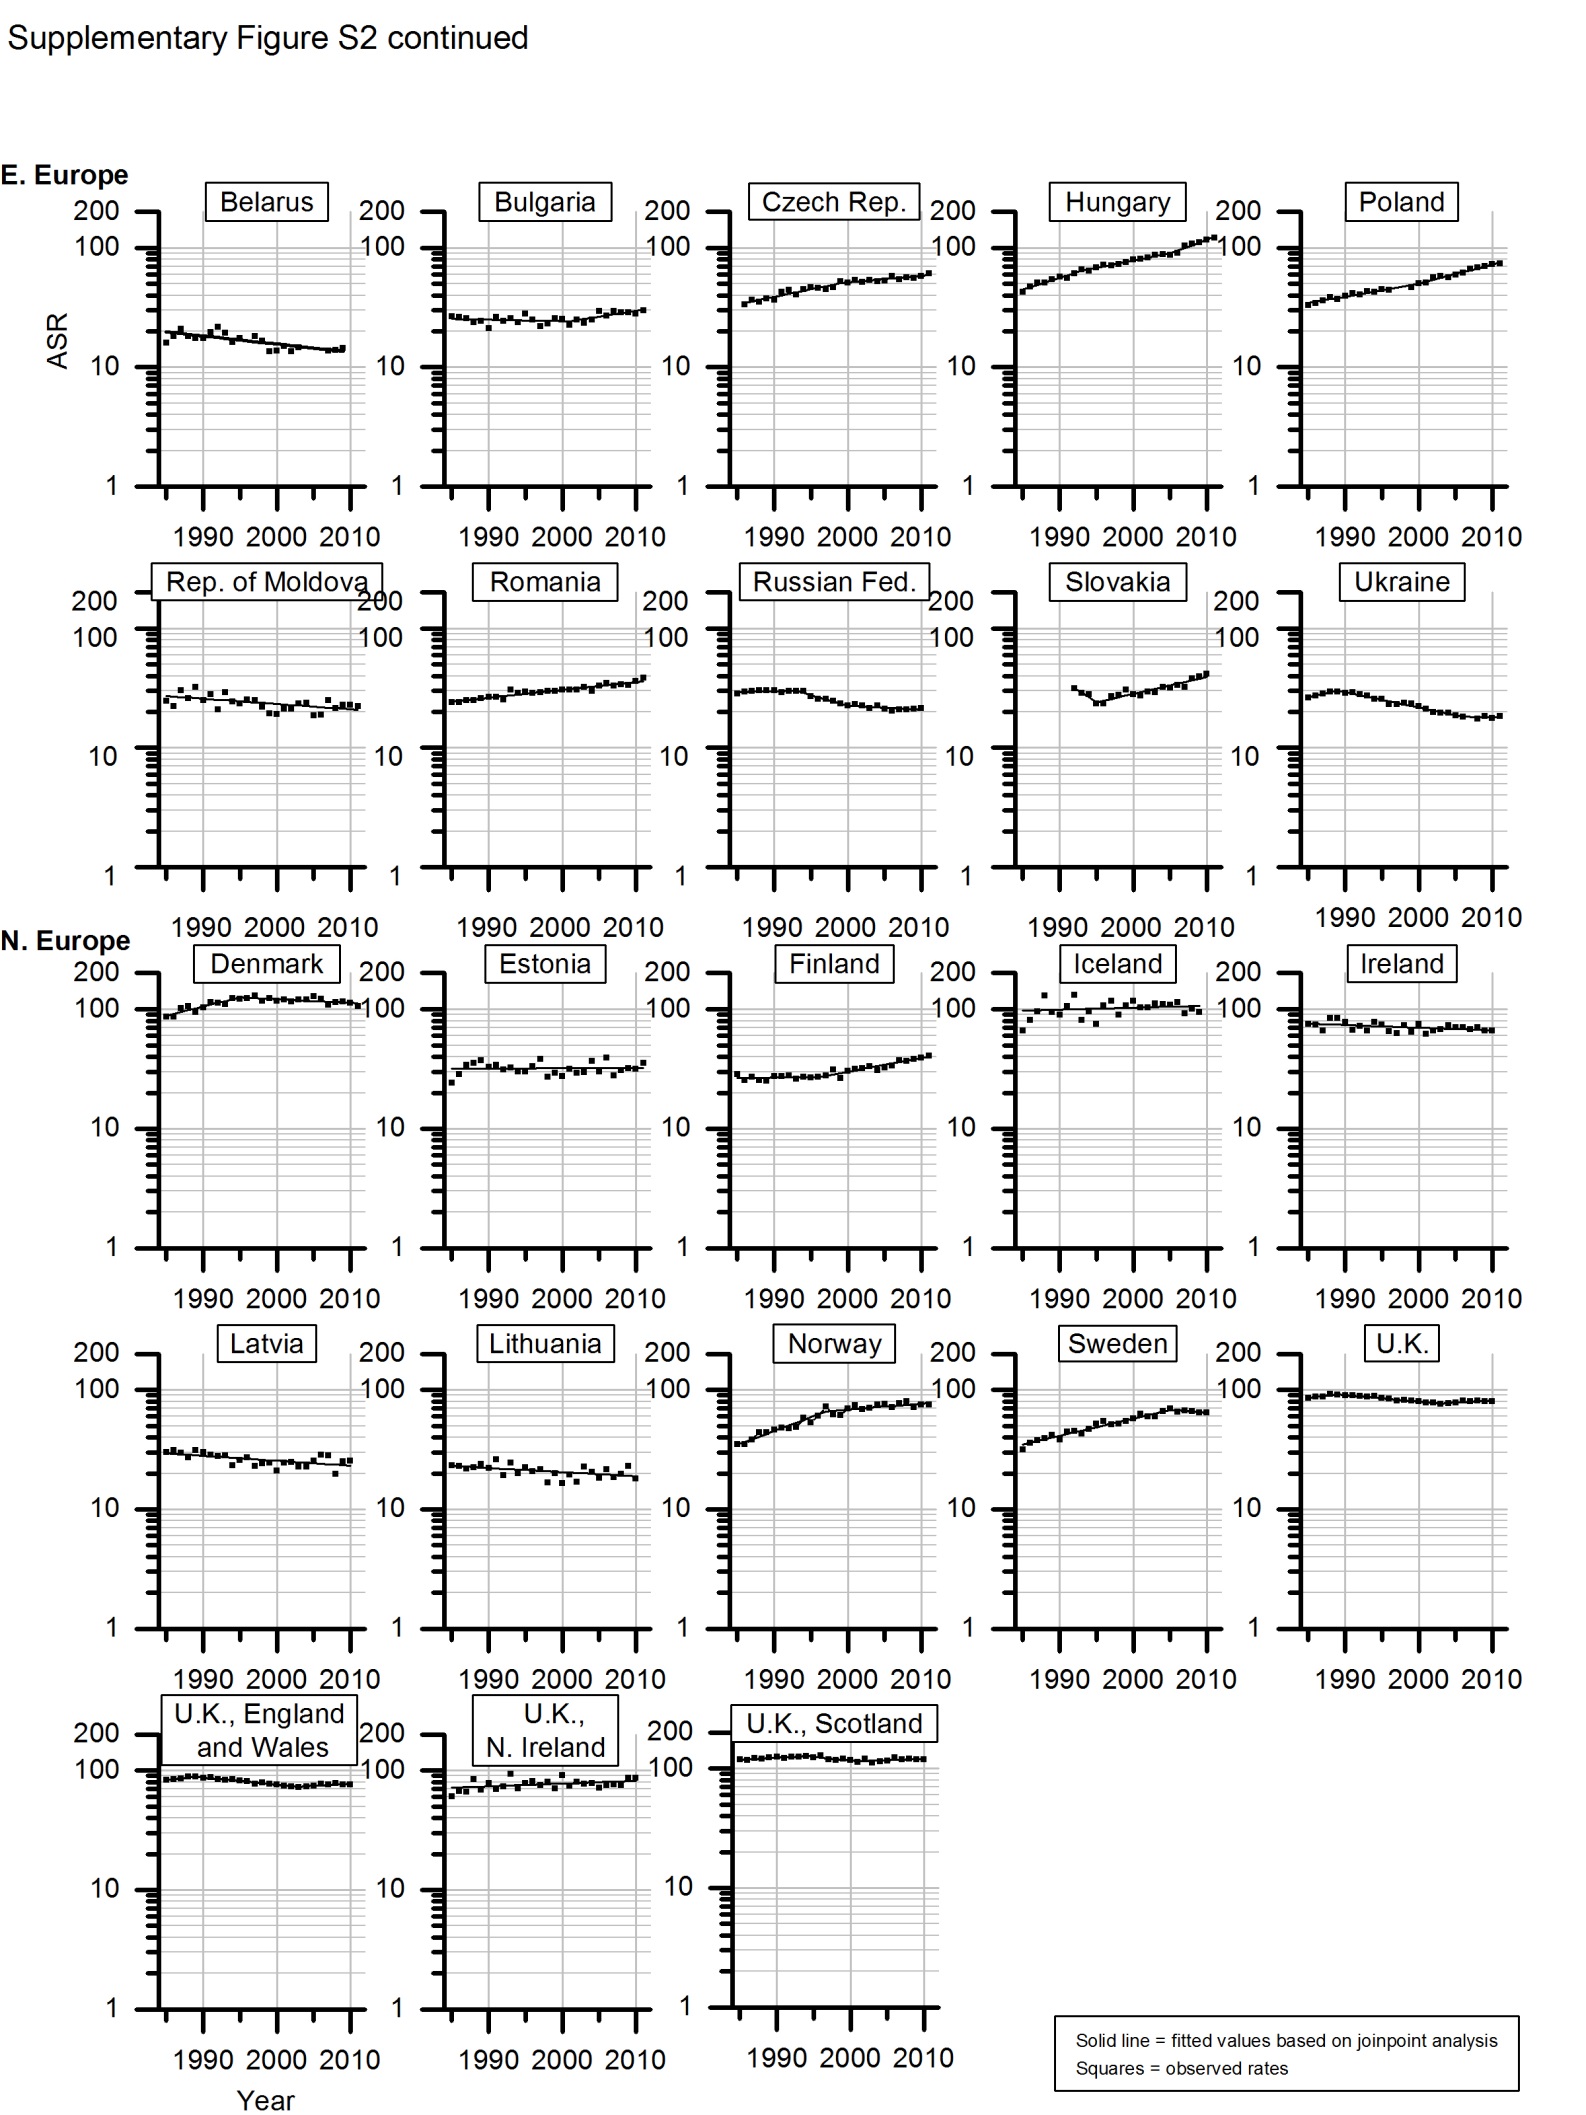
**

**
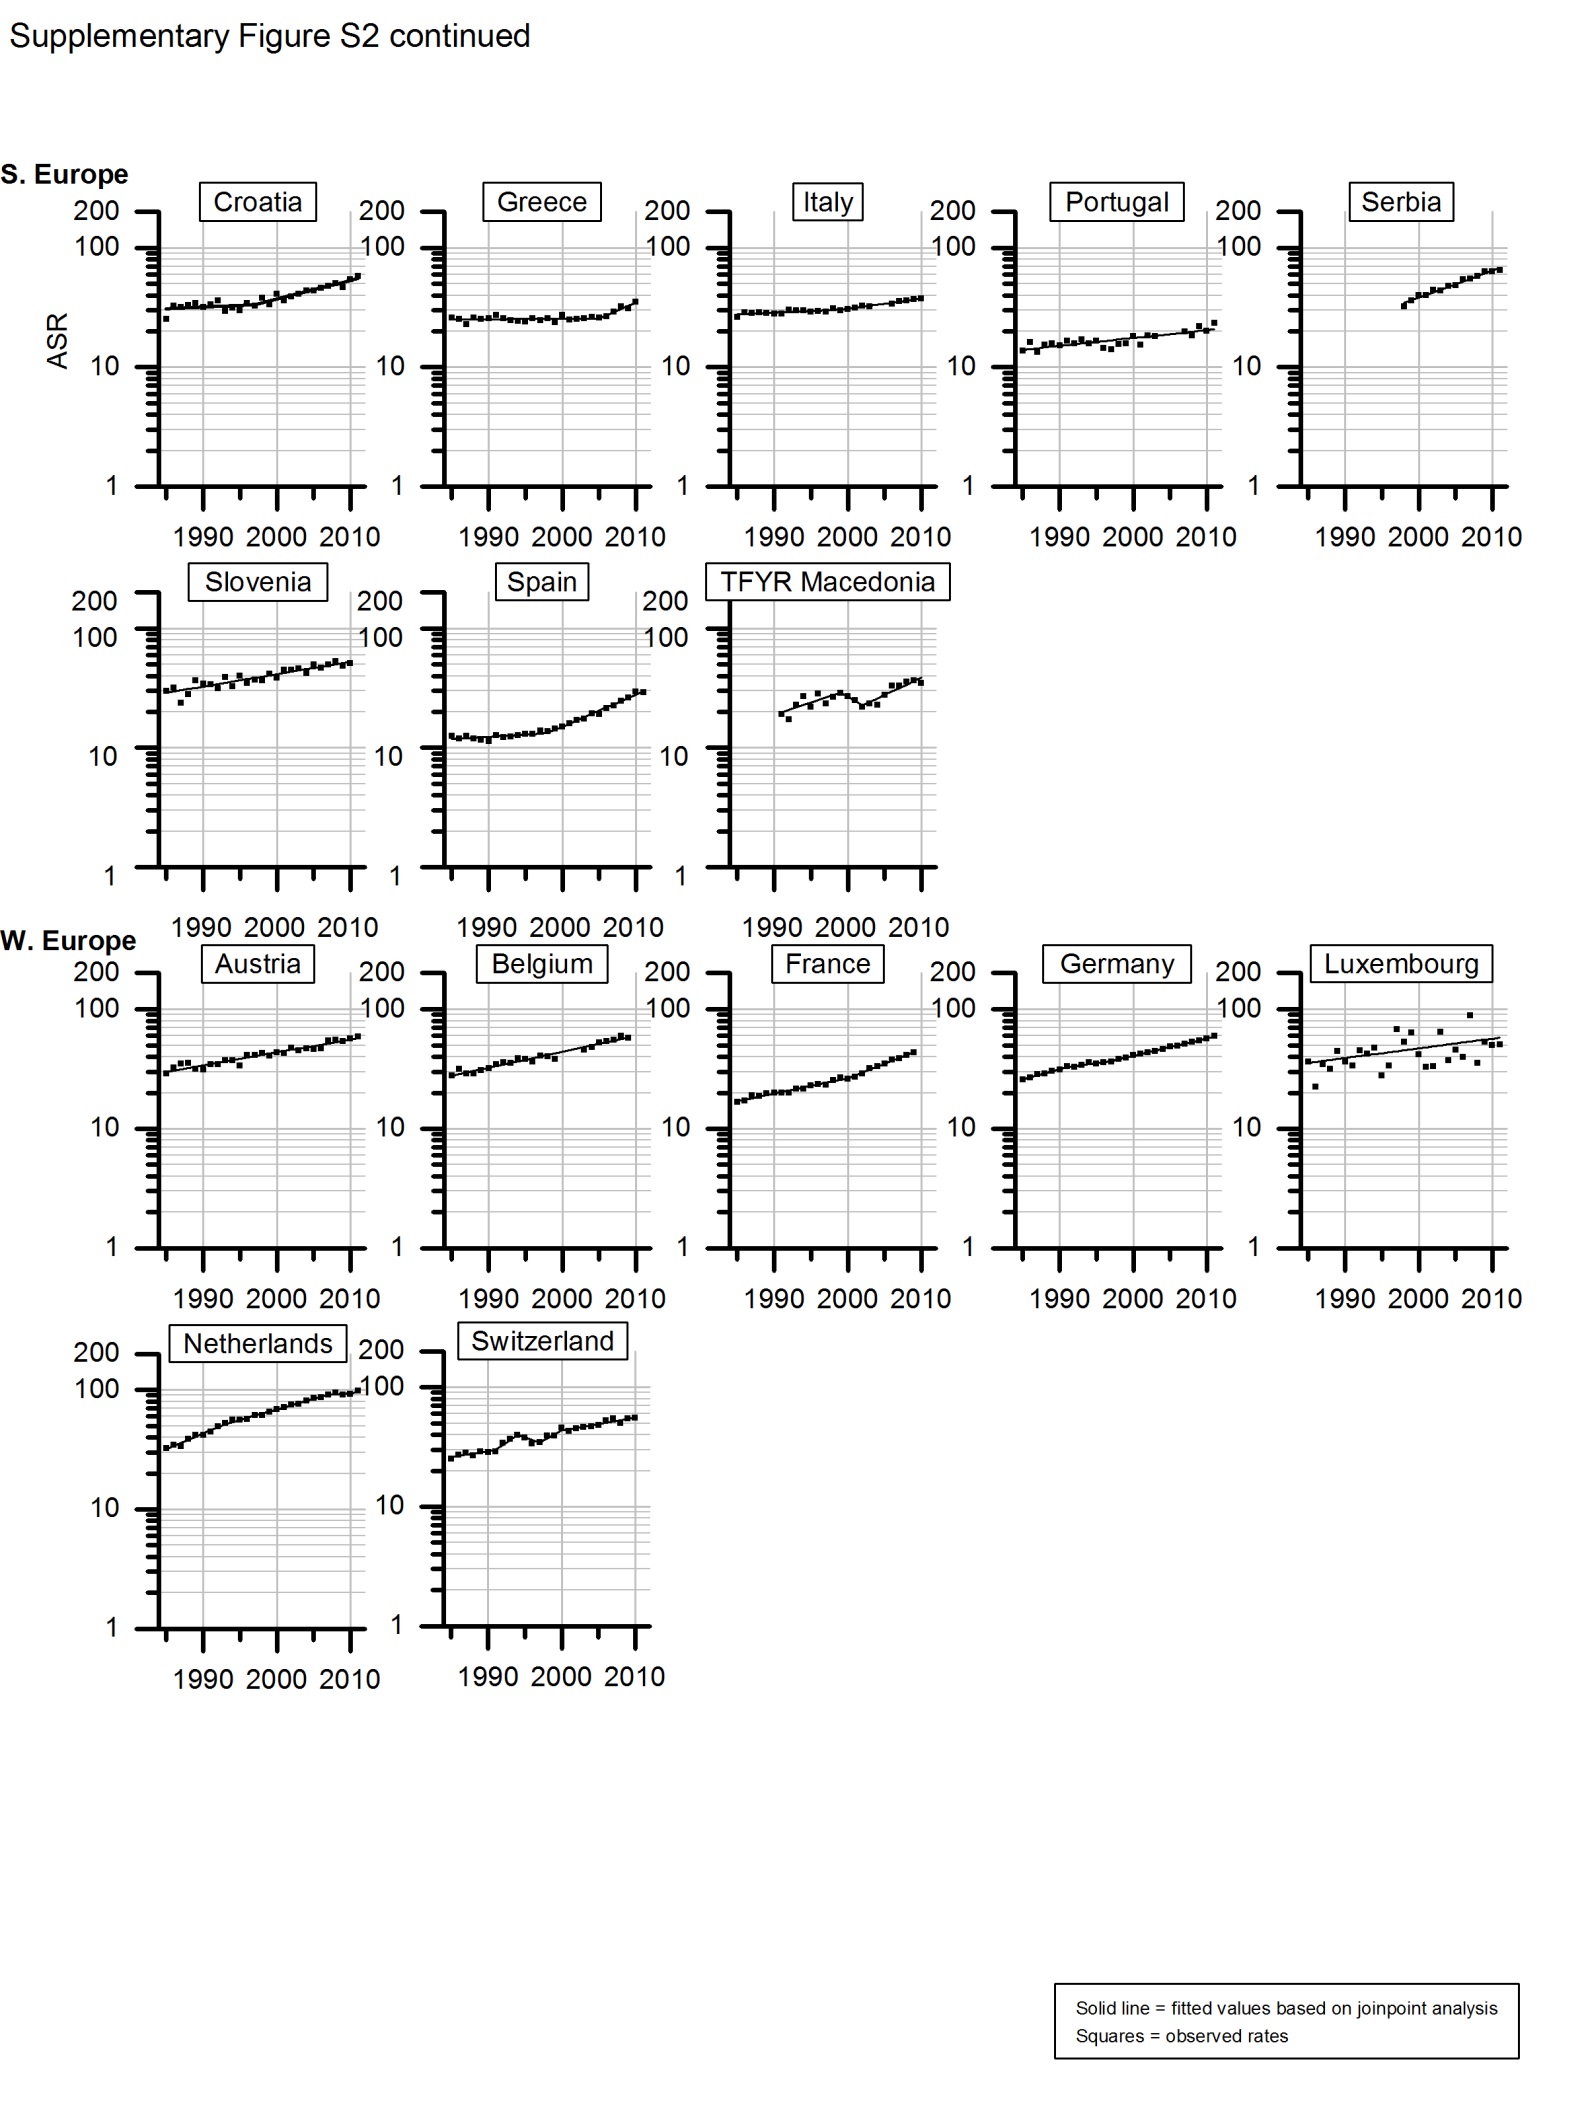
**

**
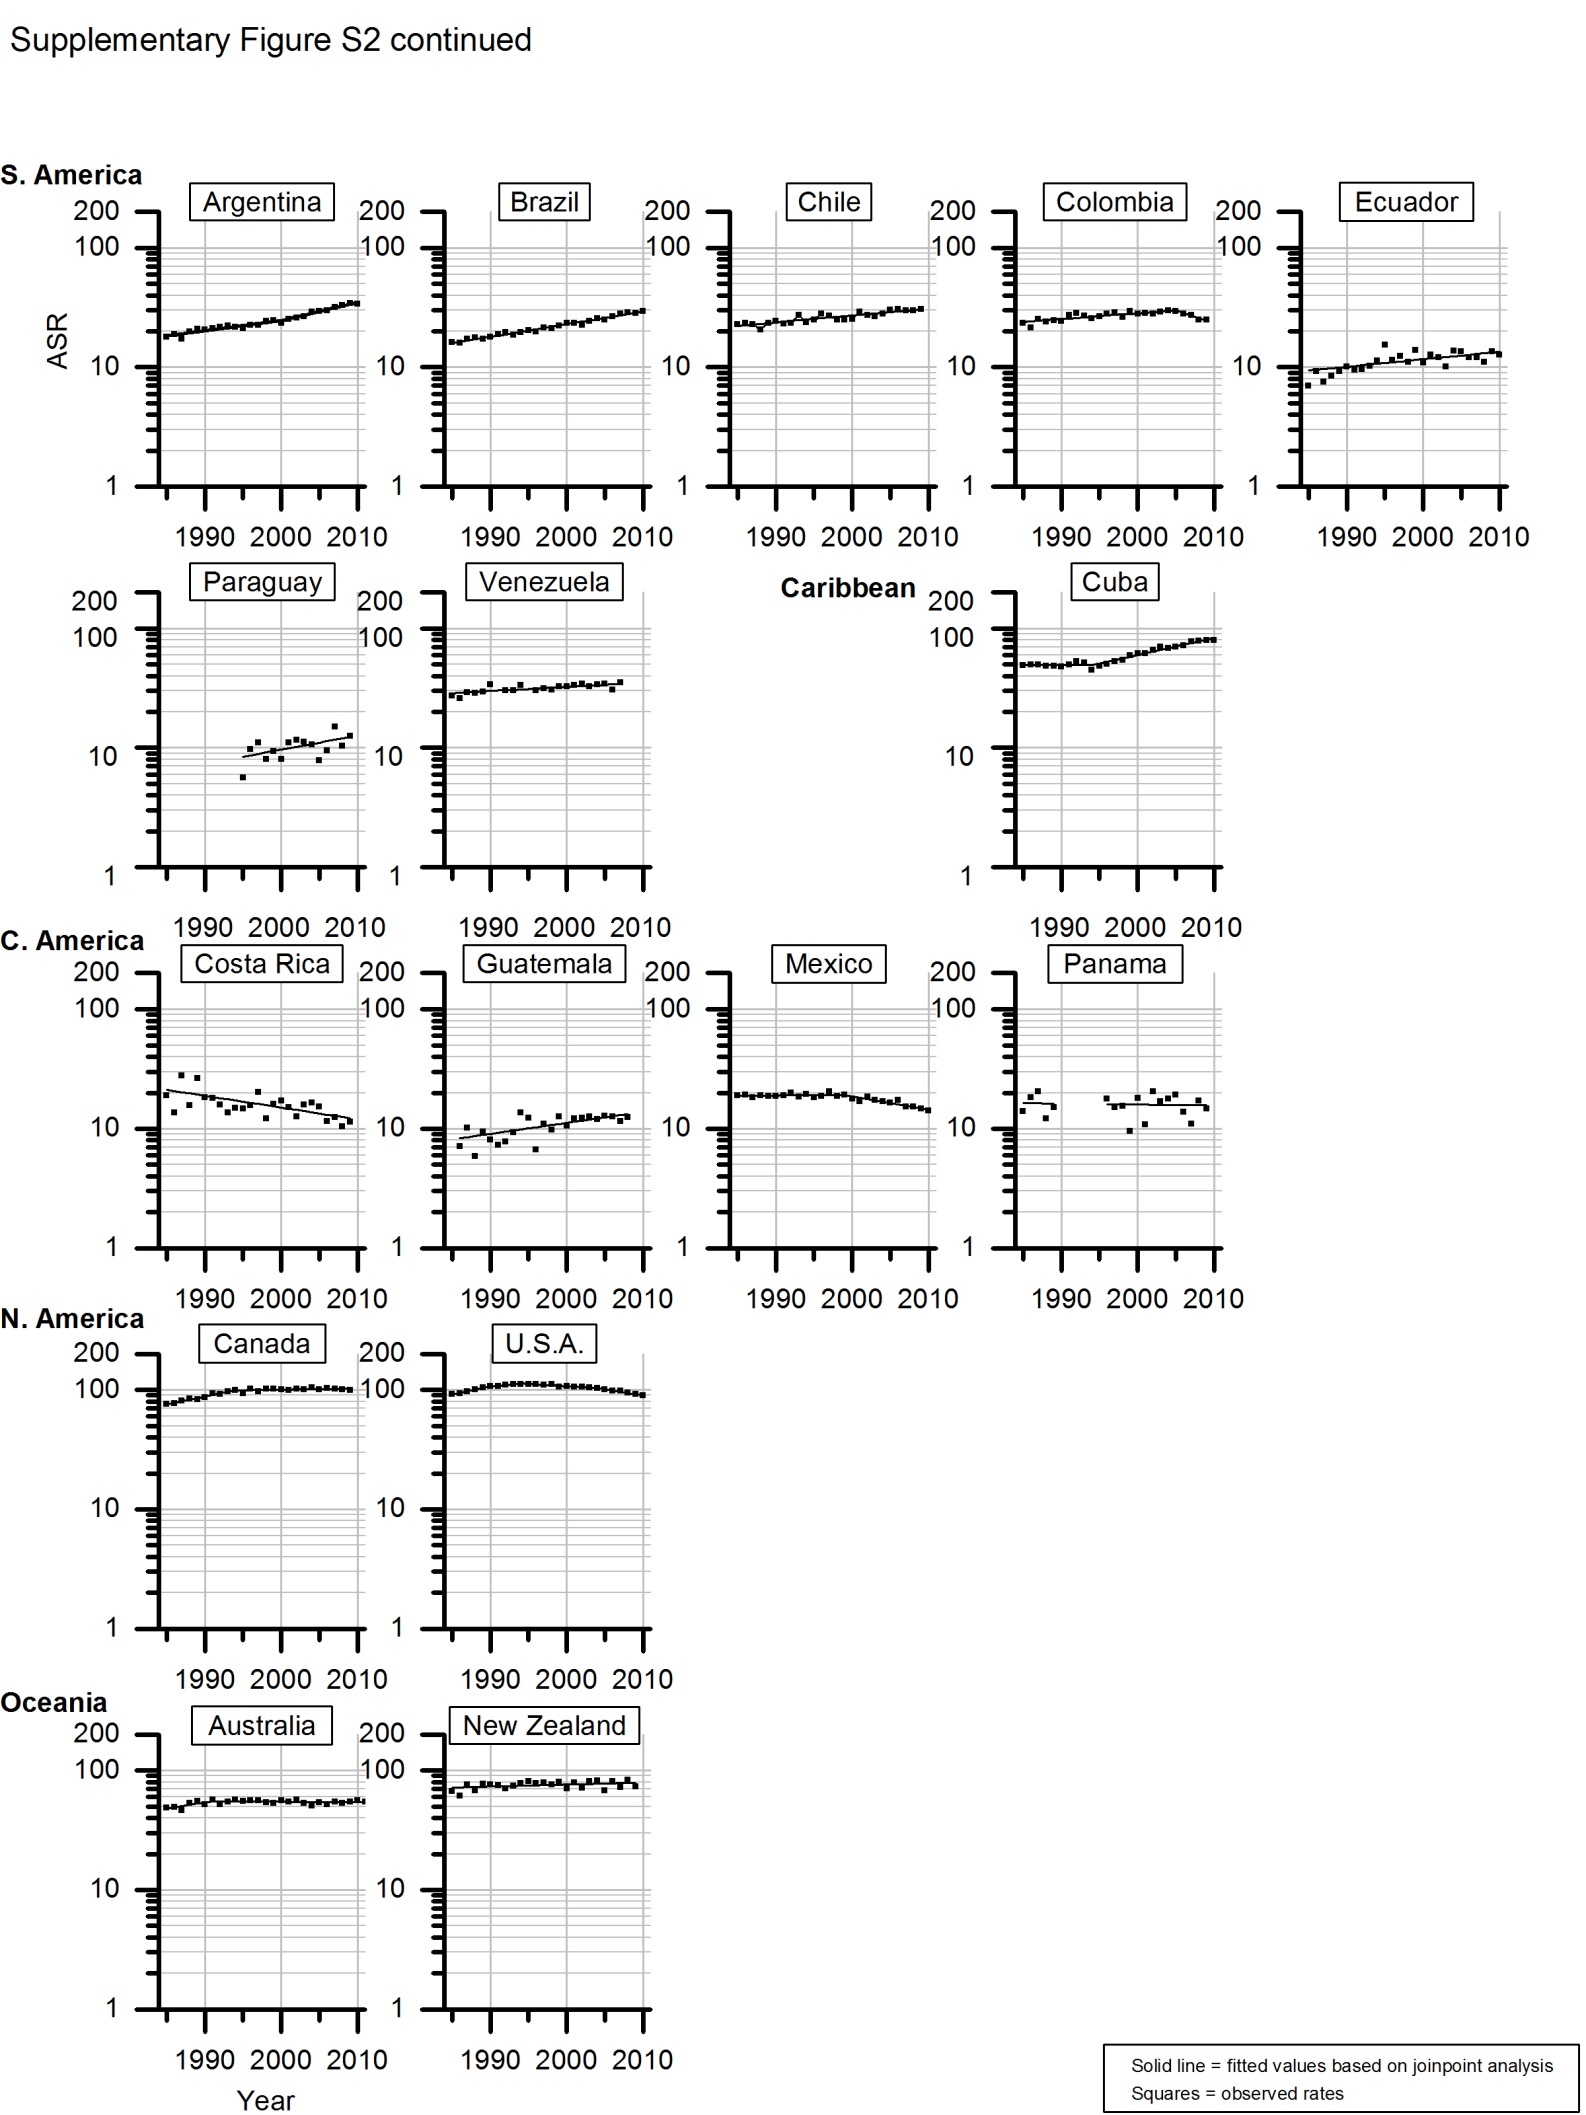
**

**
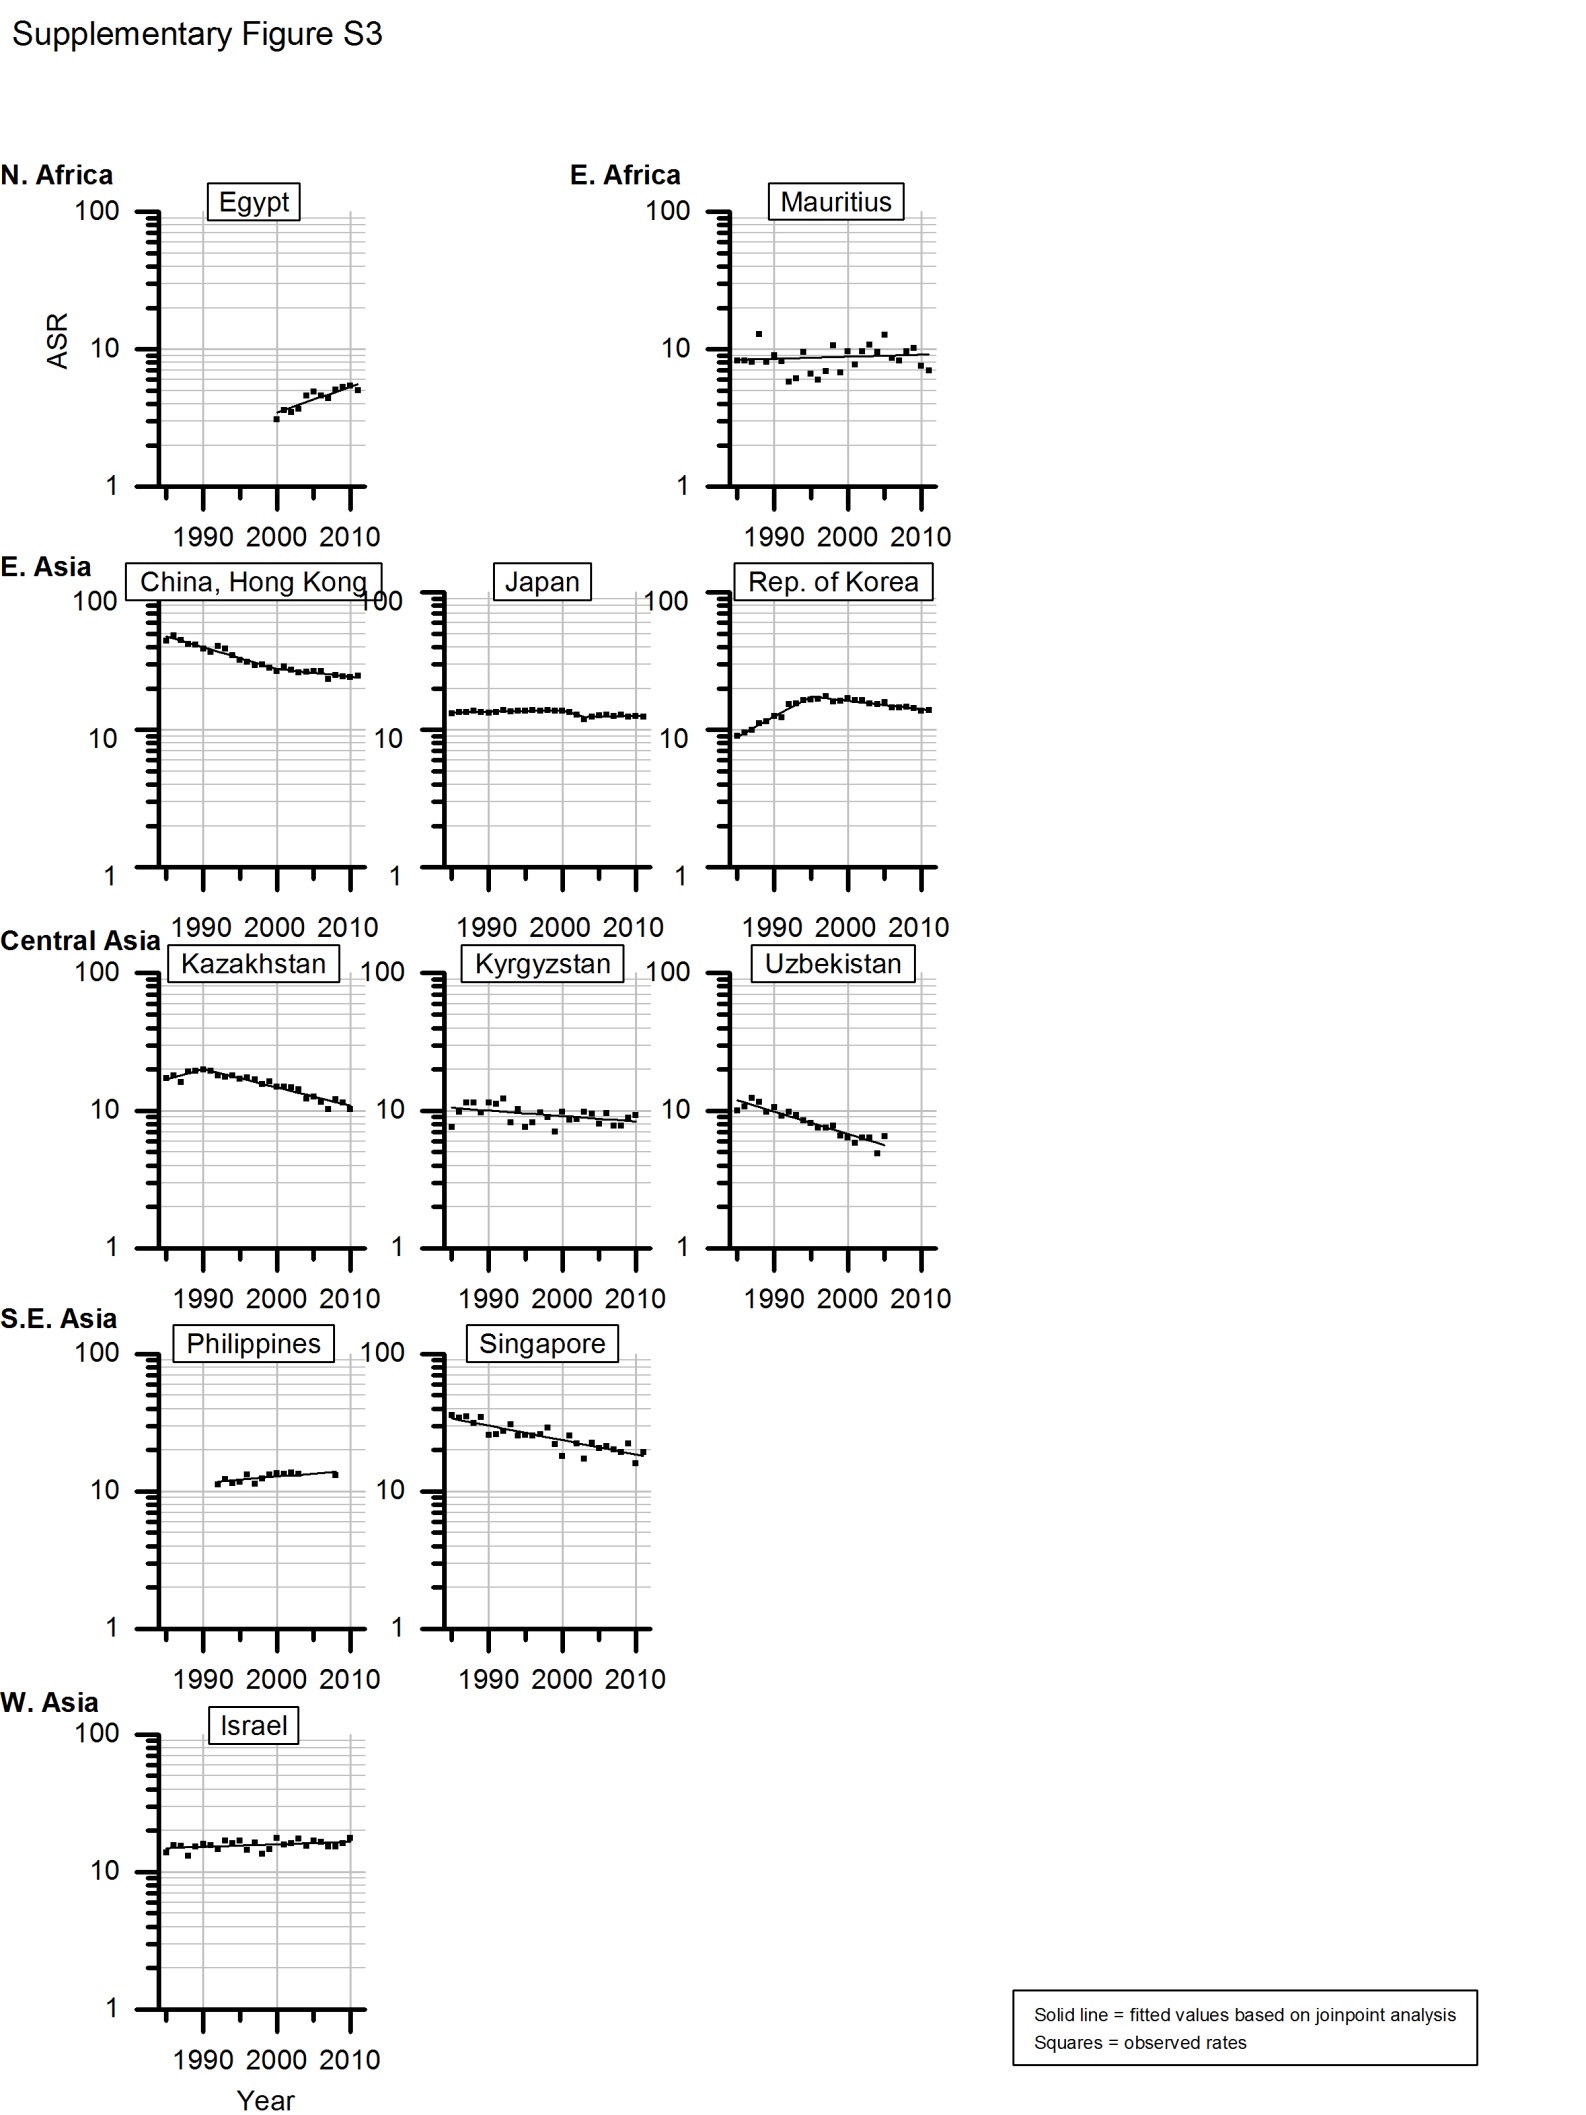
**

**
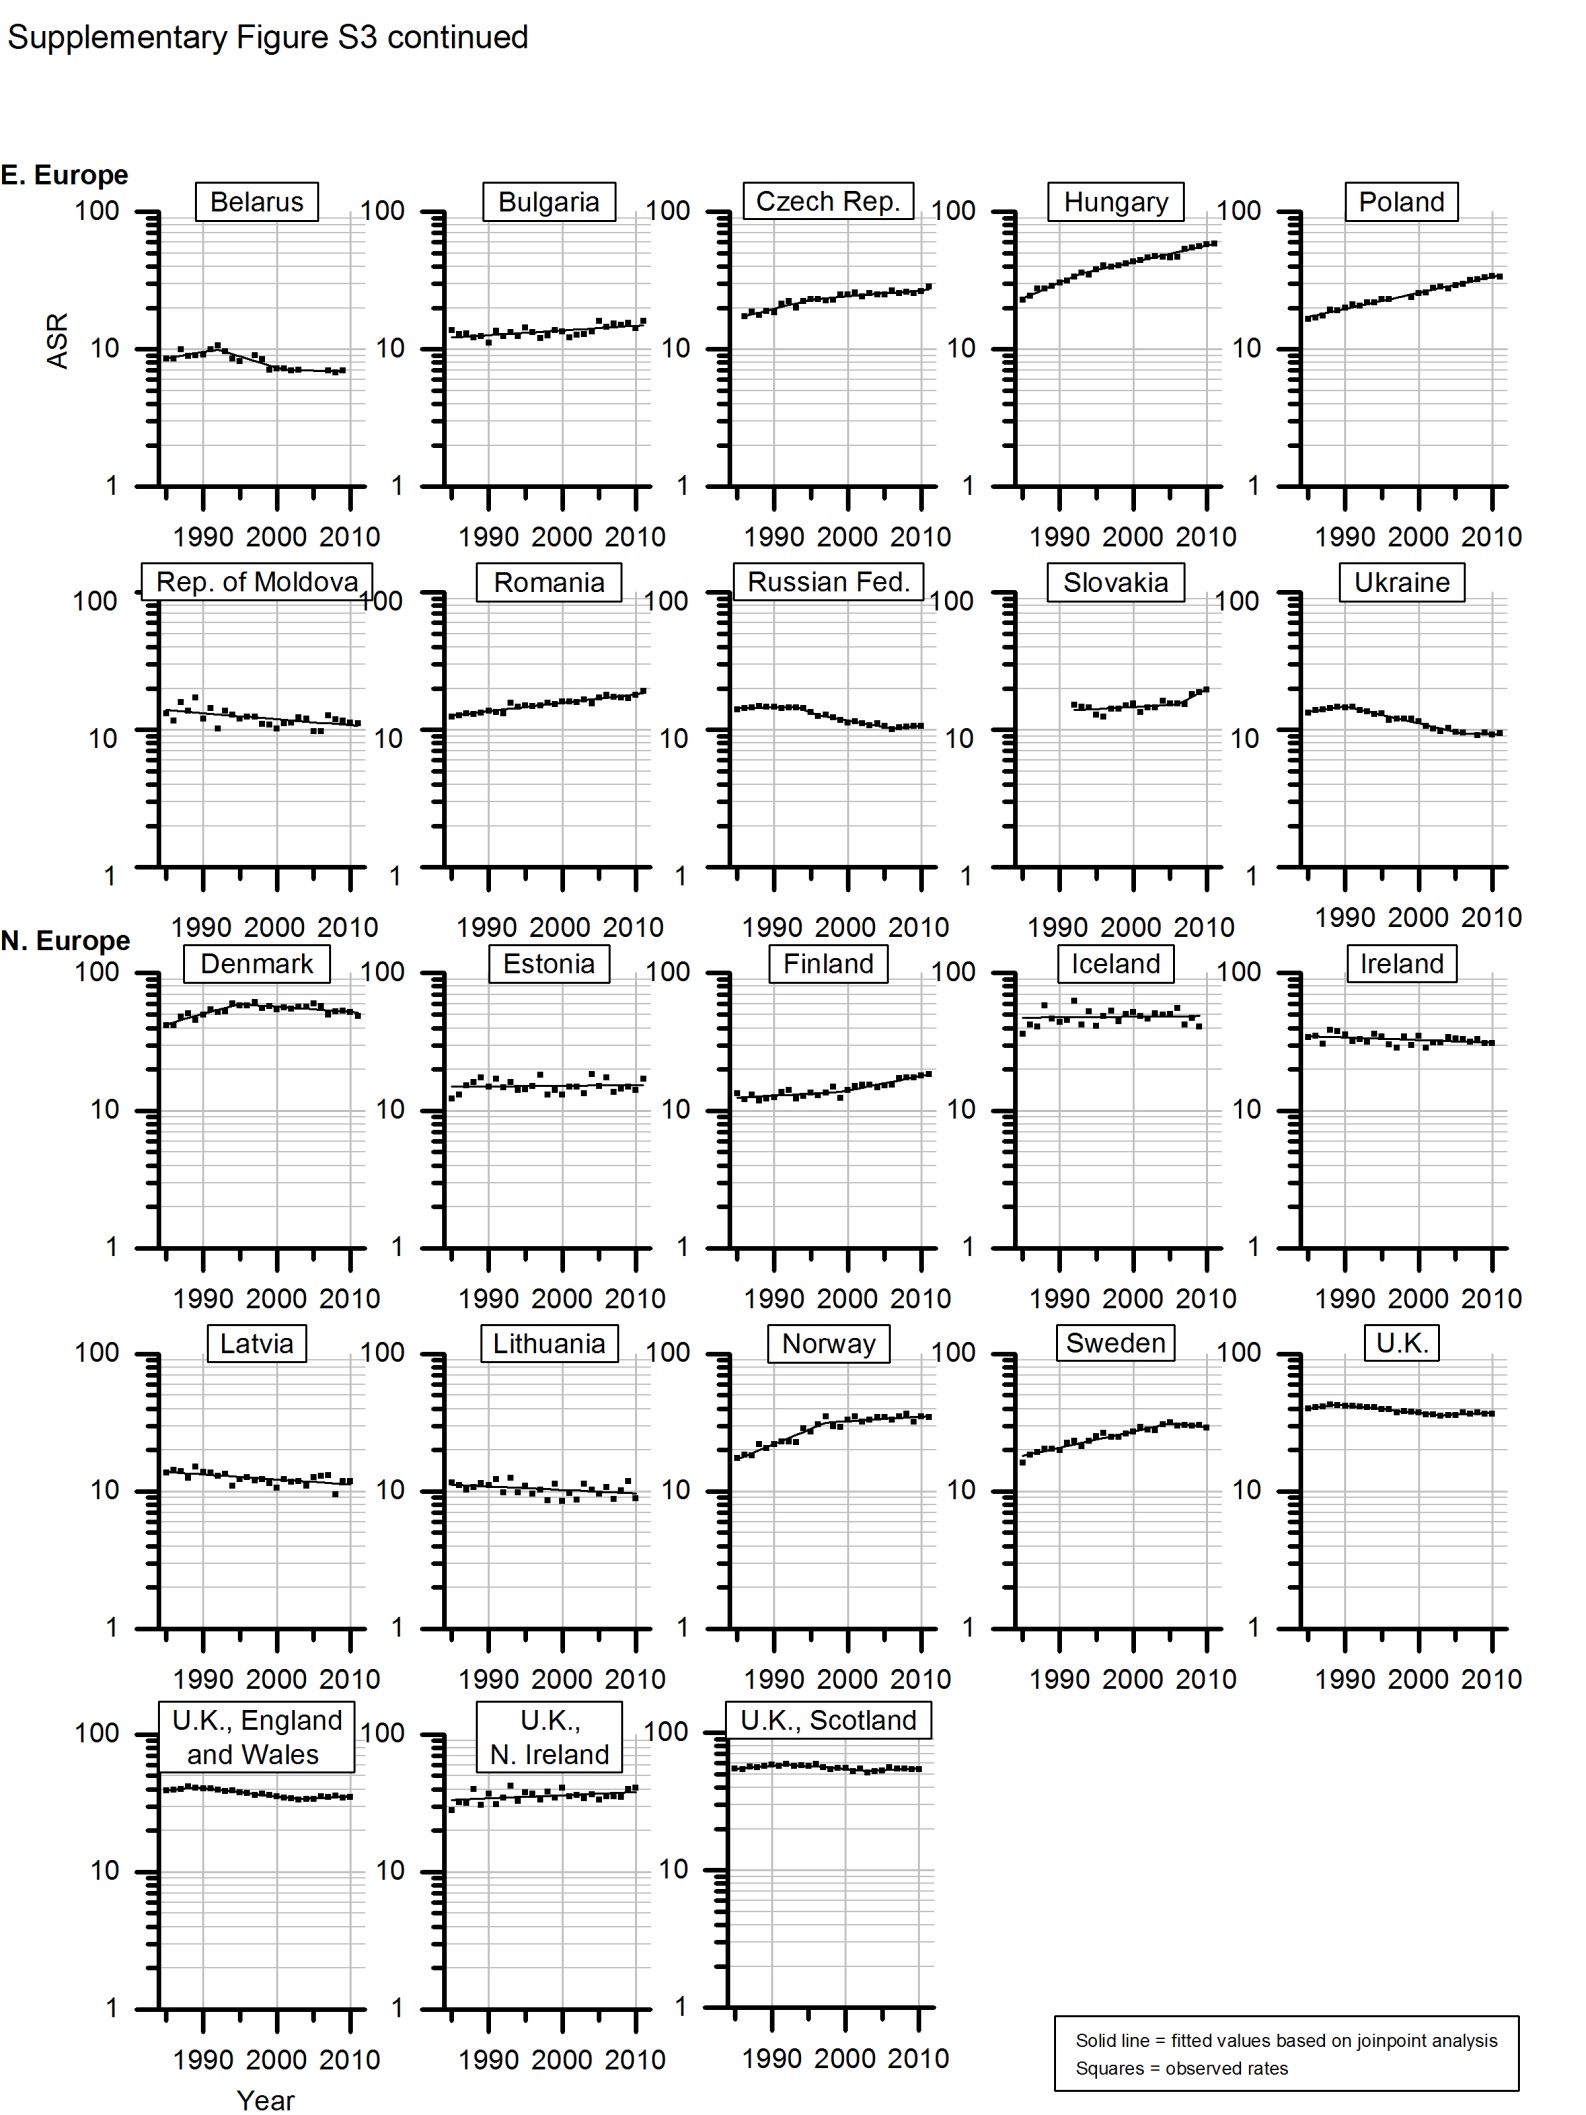
**

**
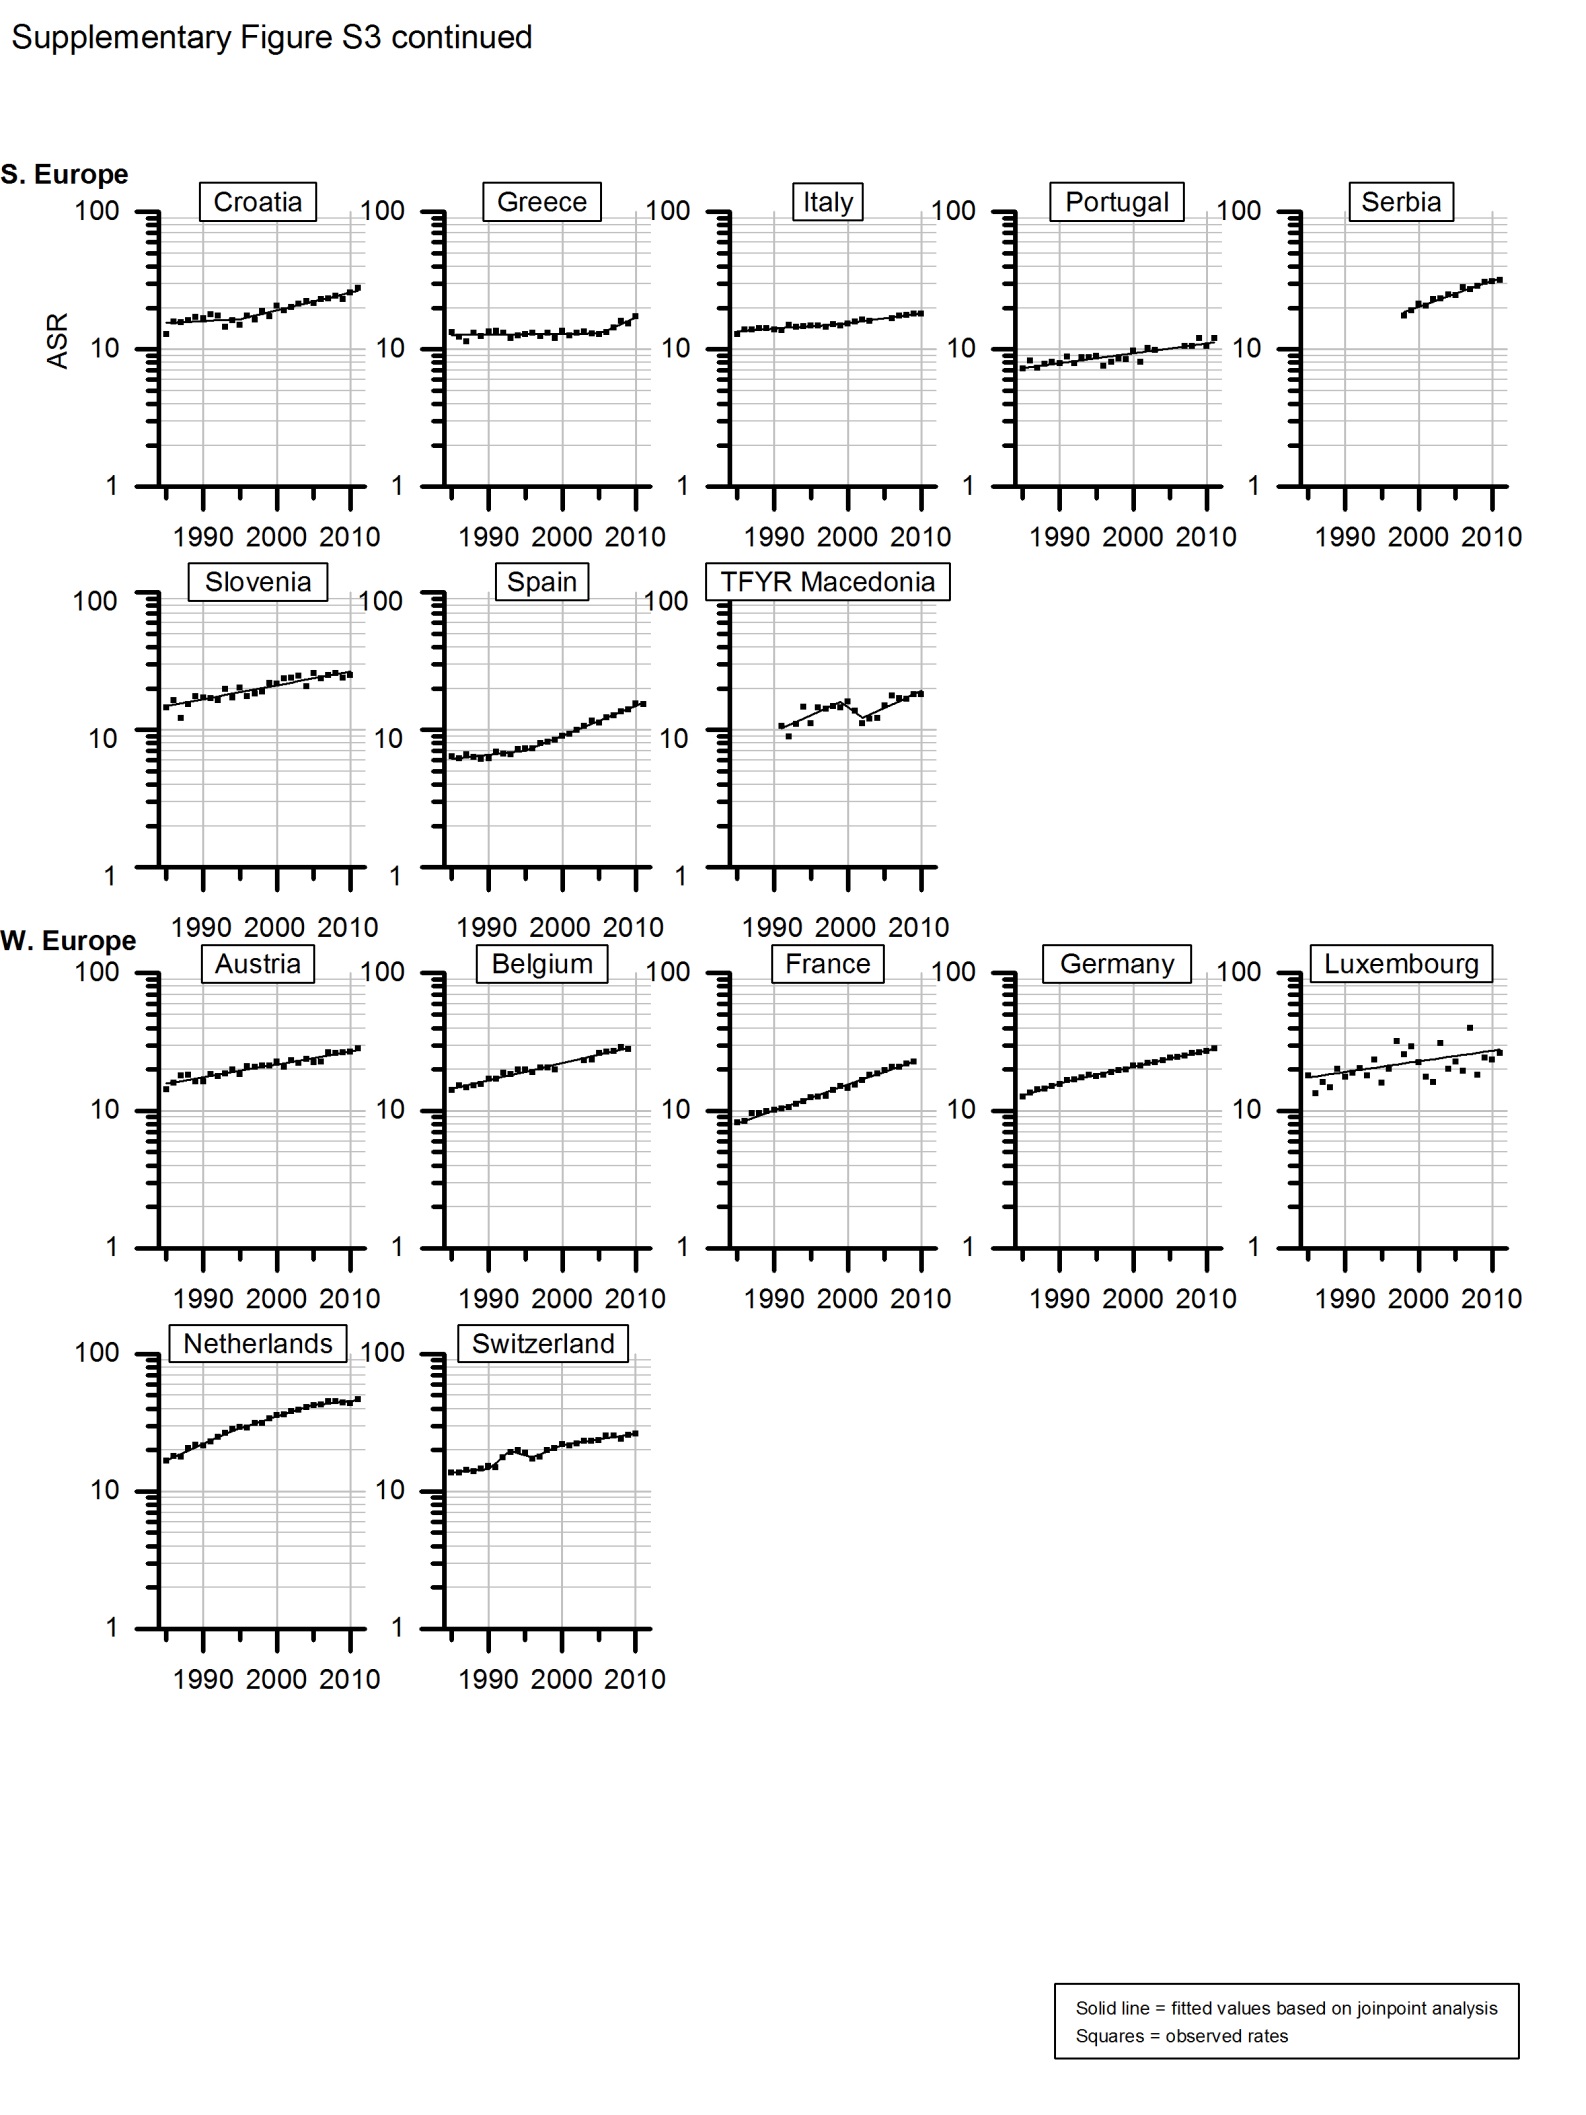
**

**
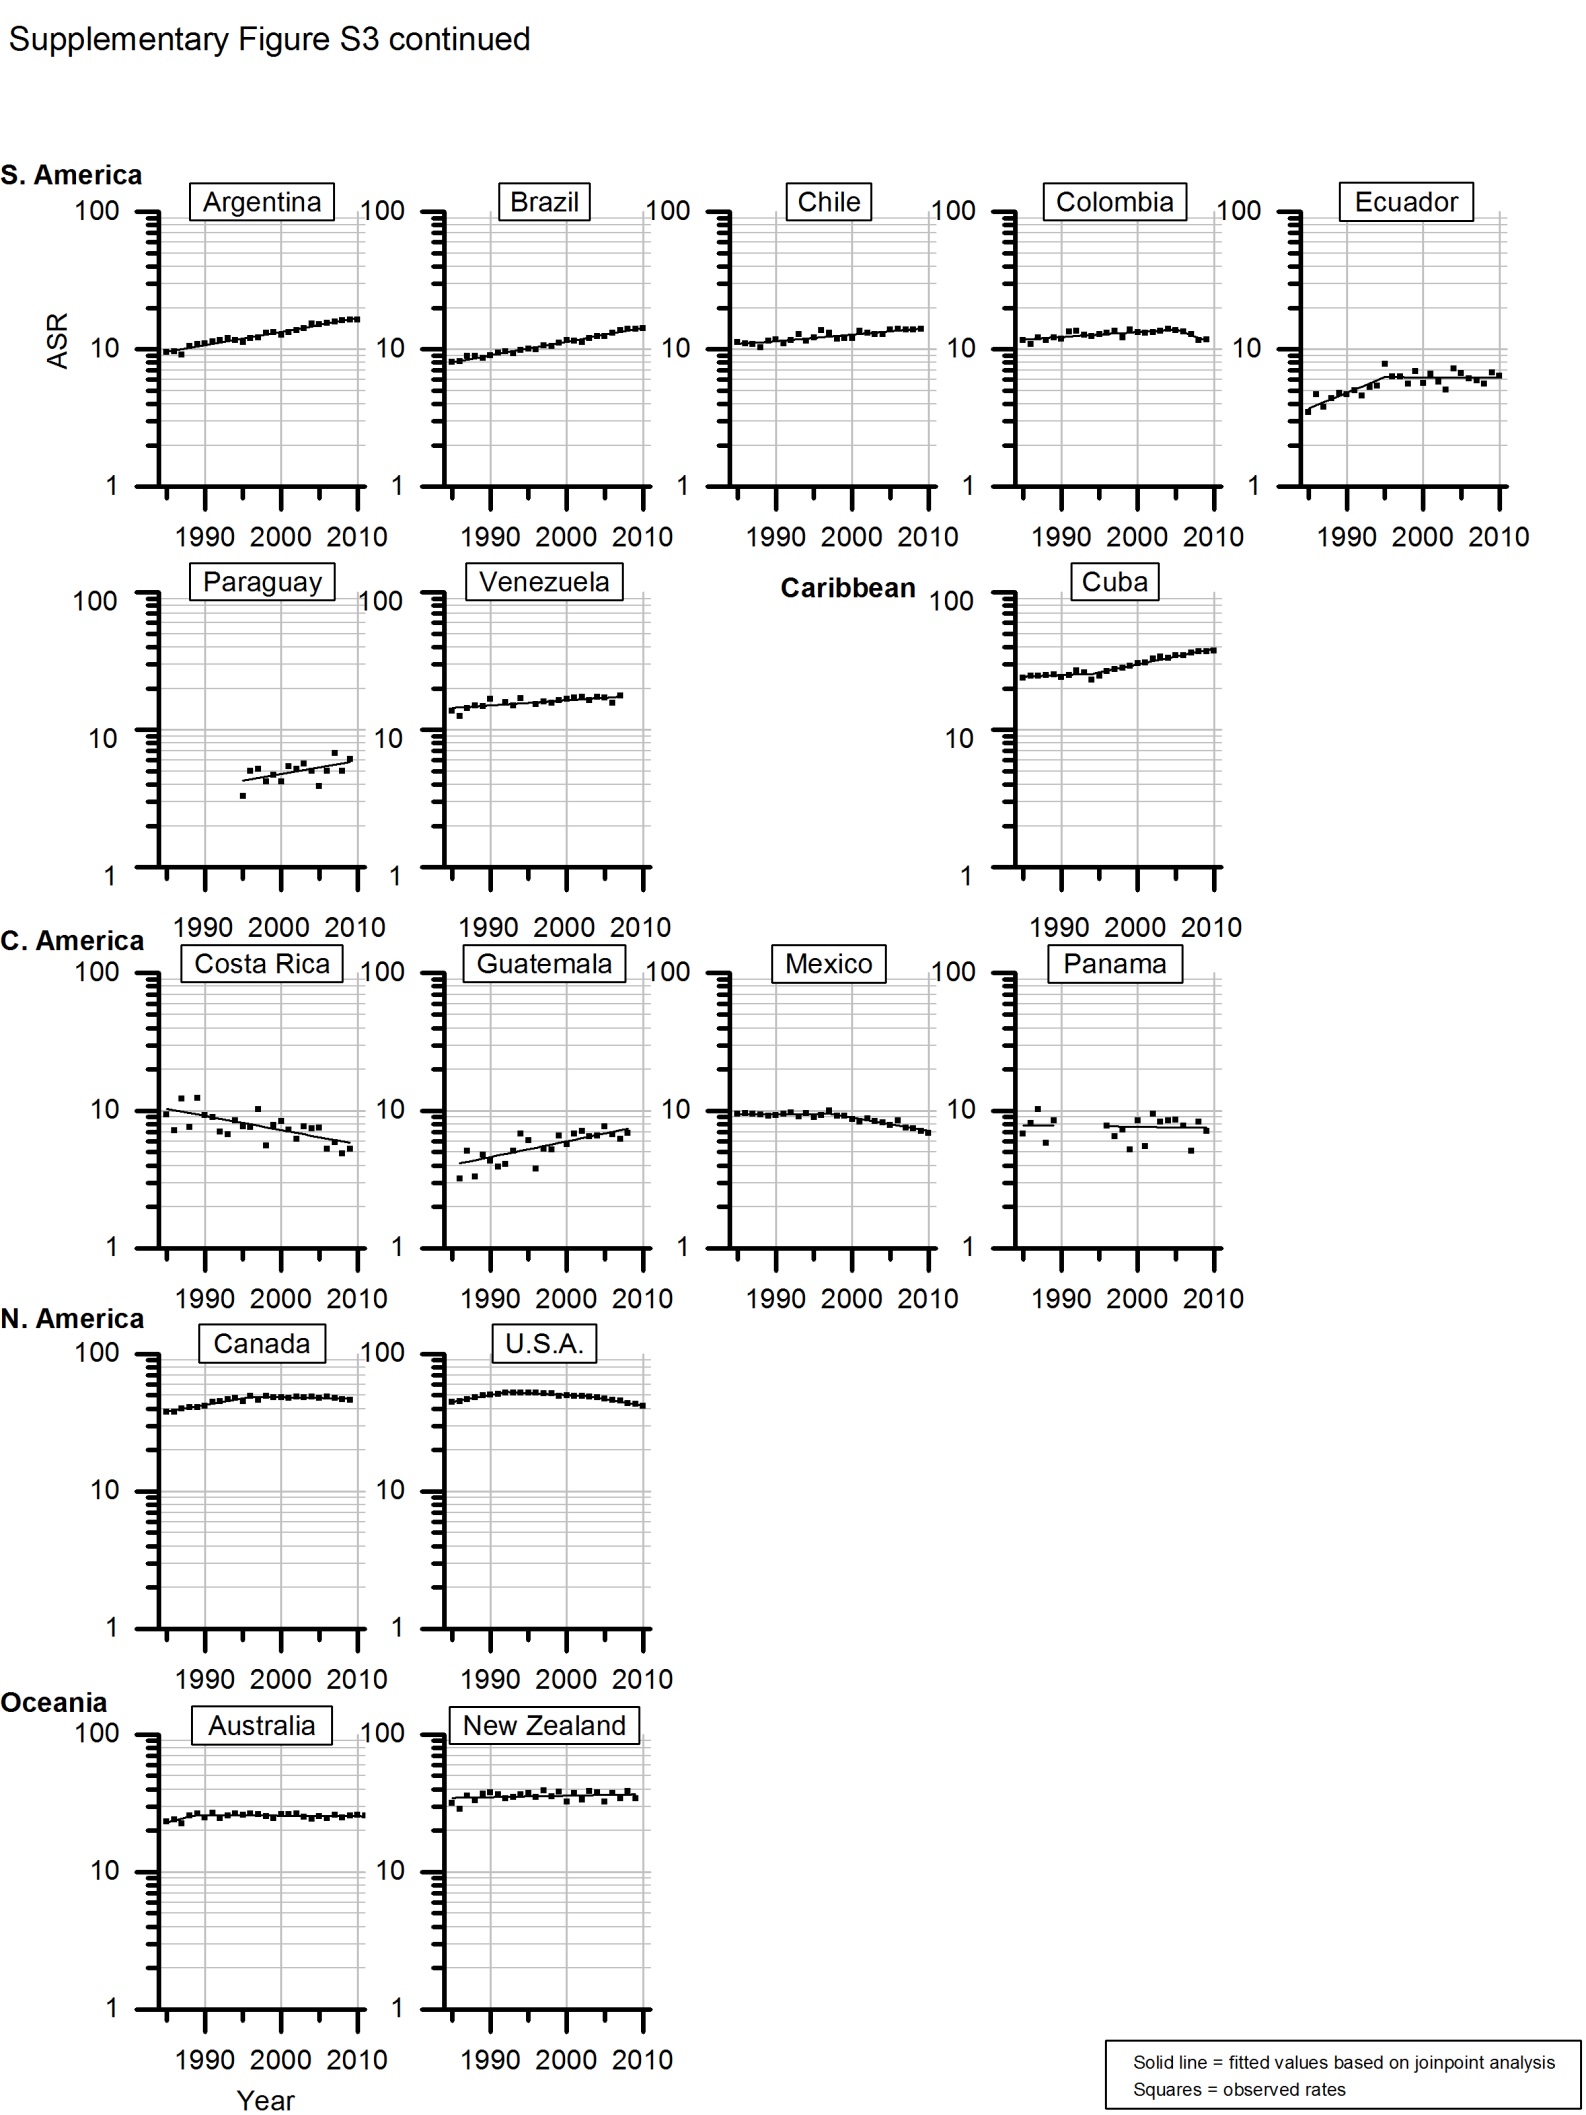
**

**
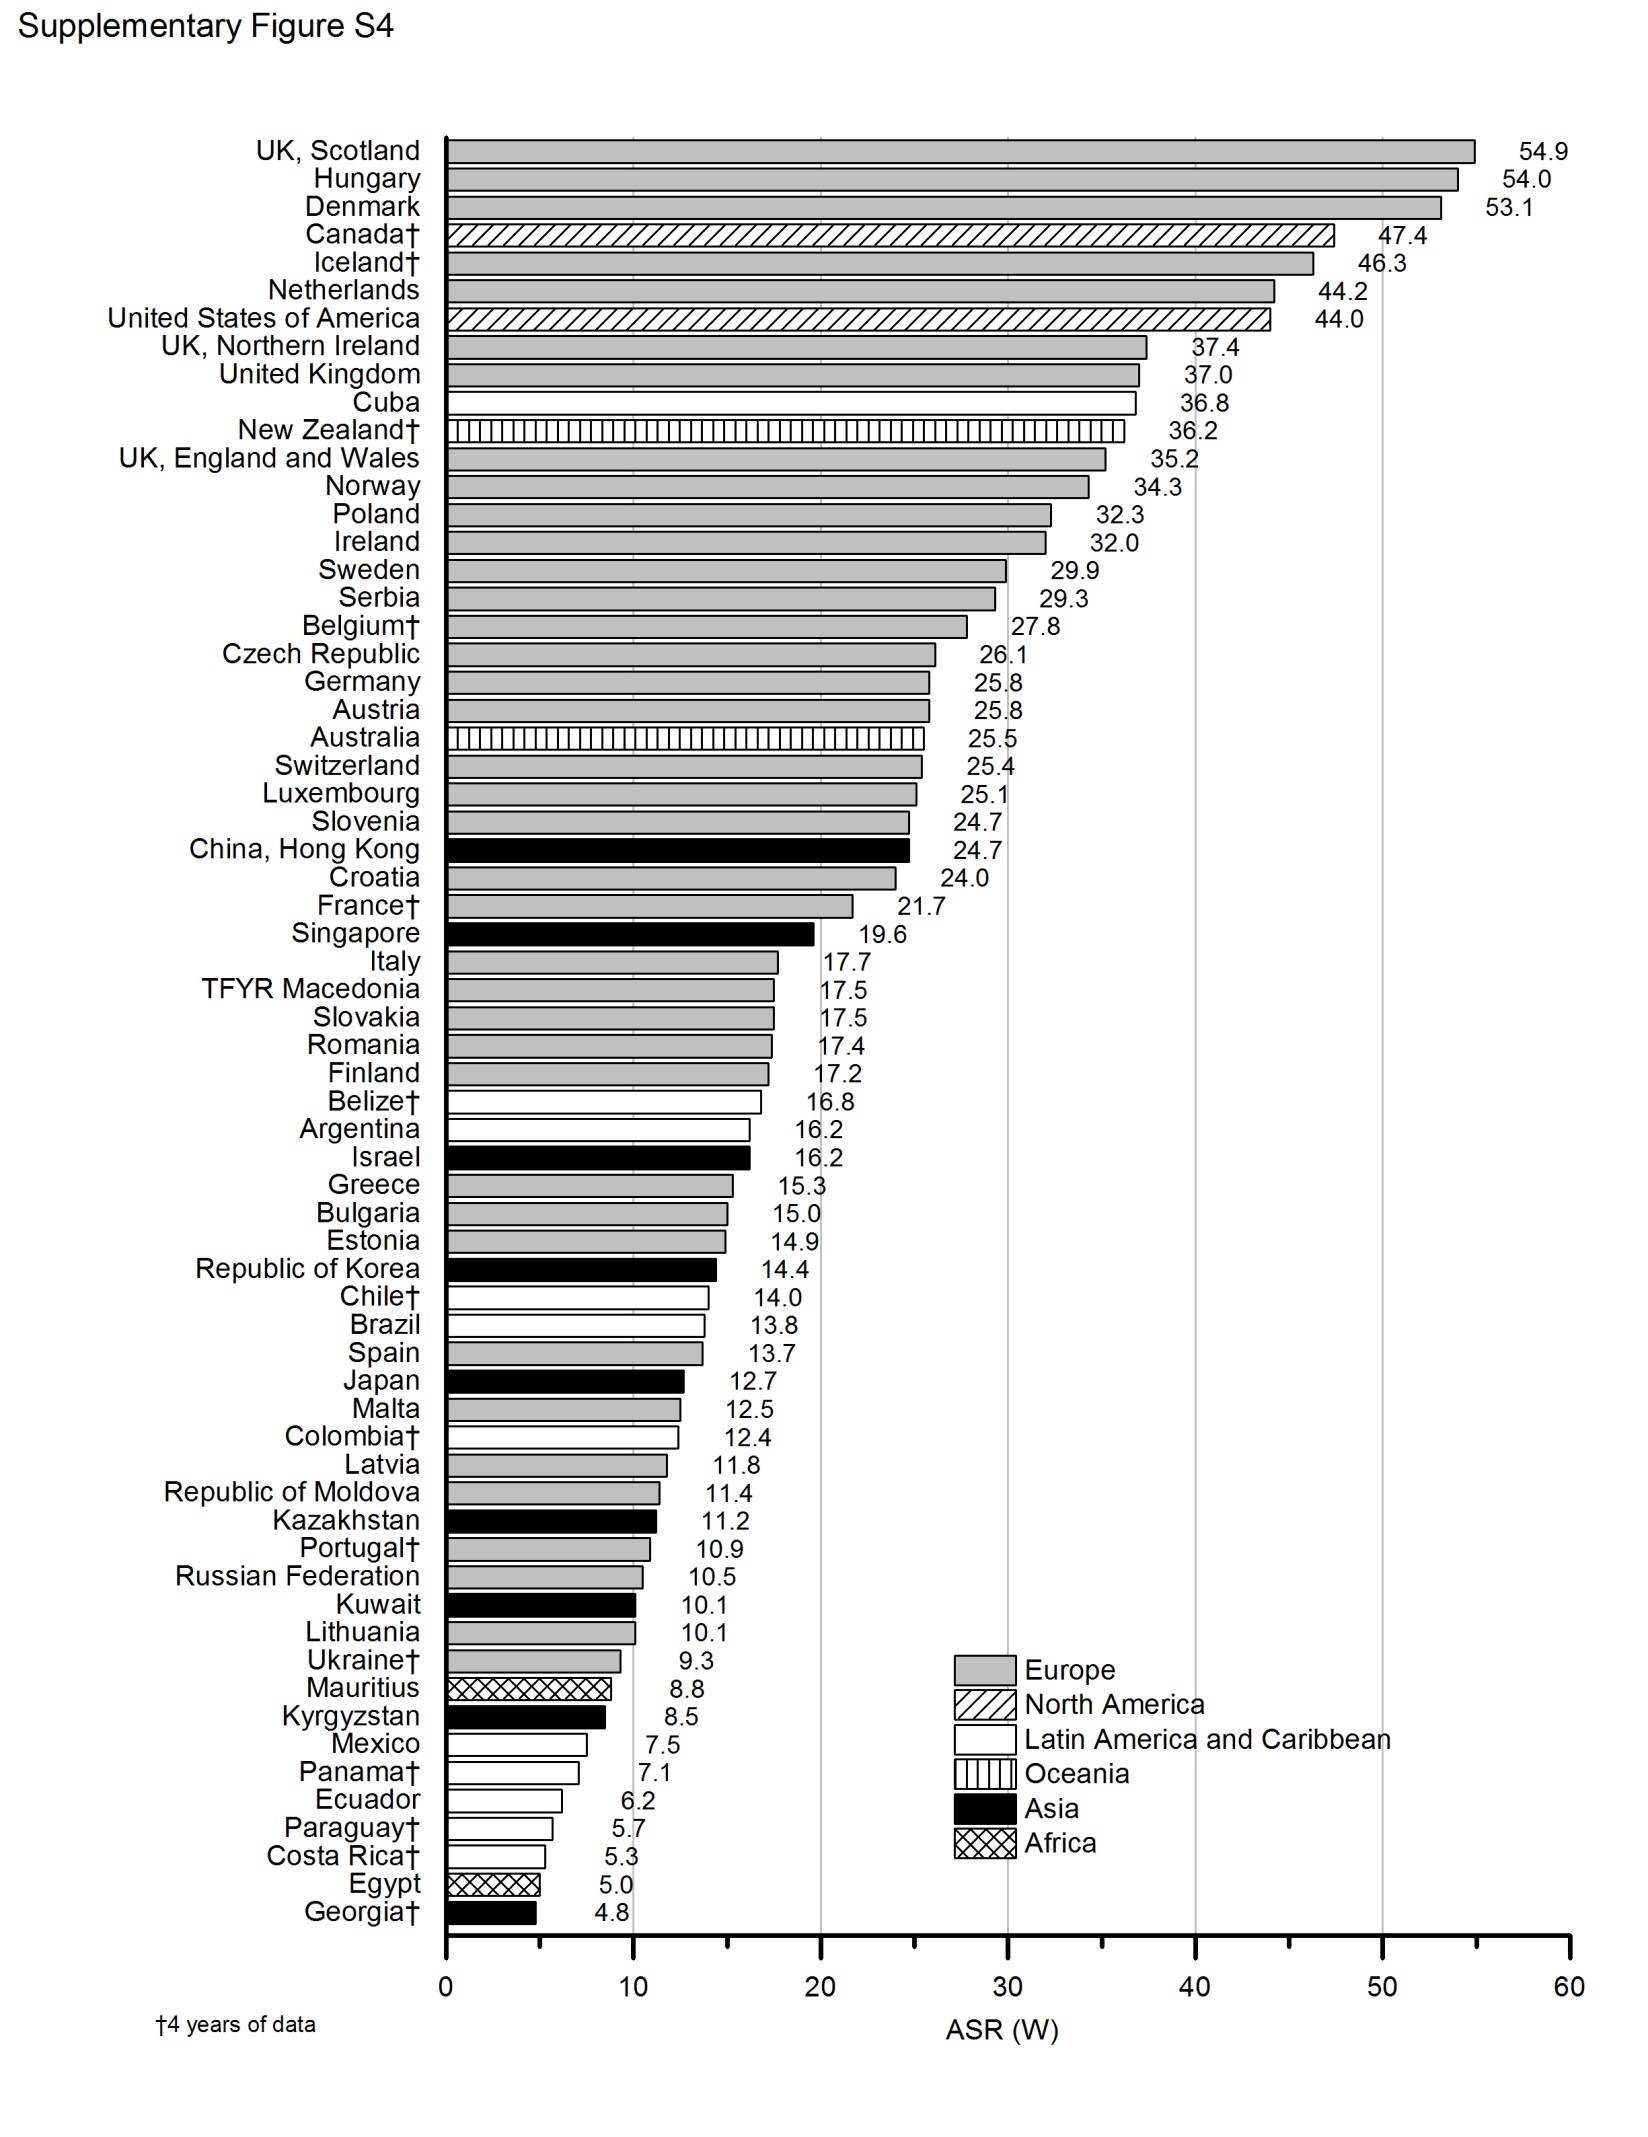
**

**
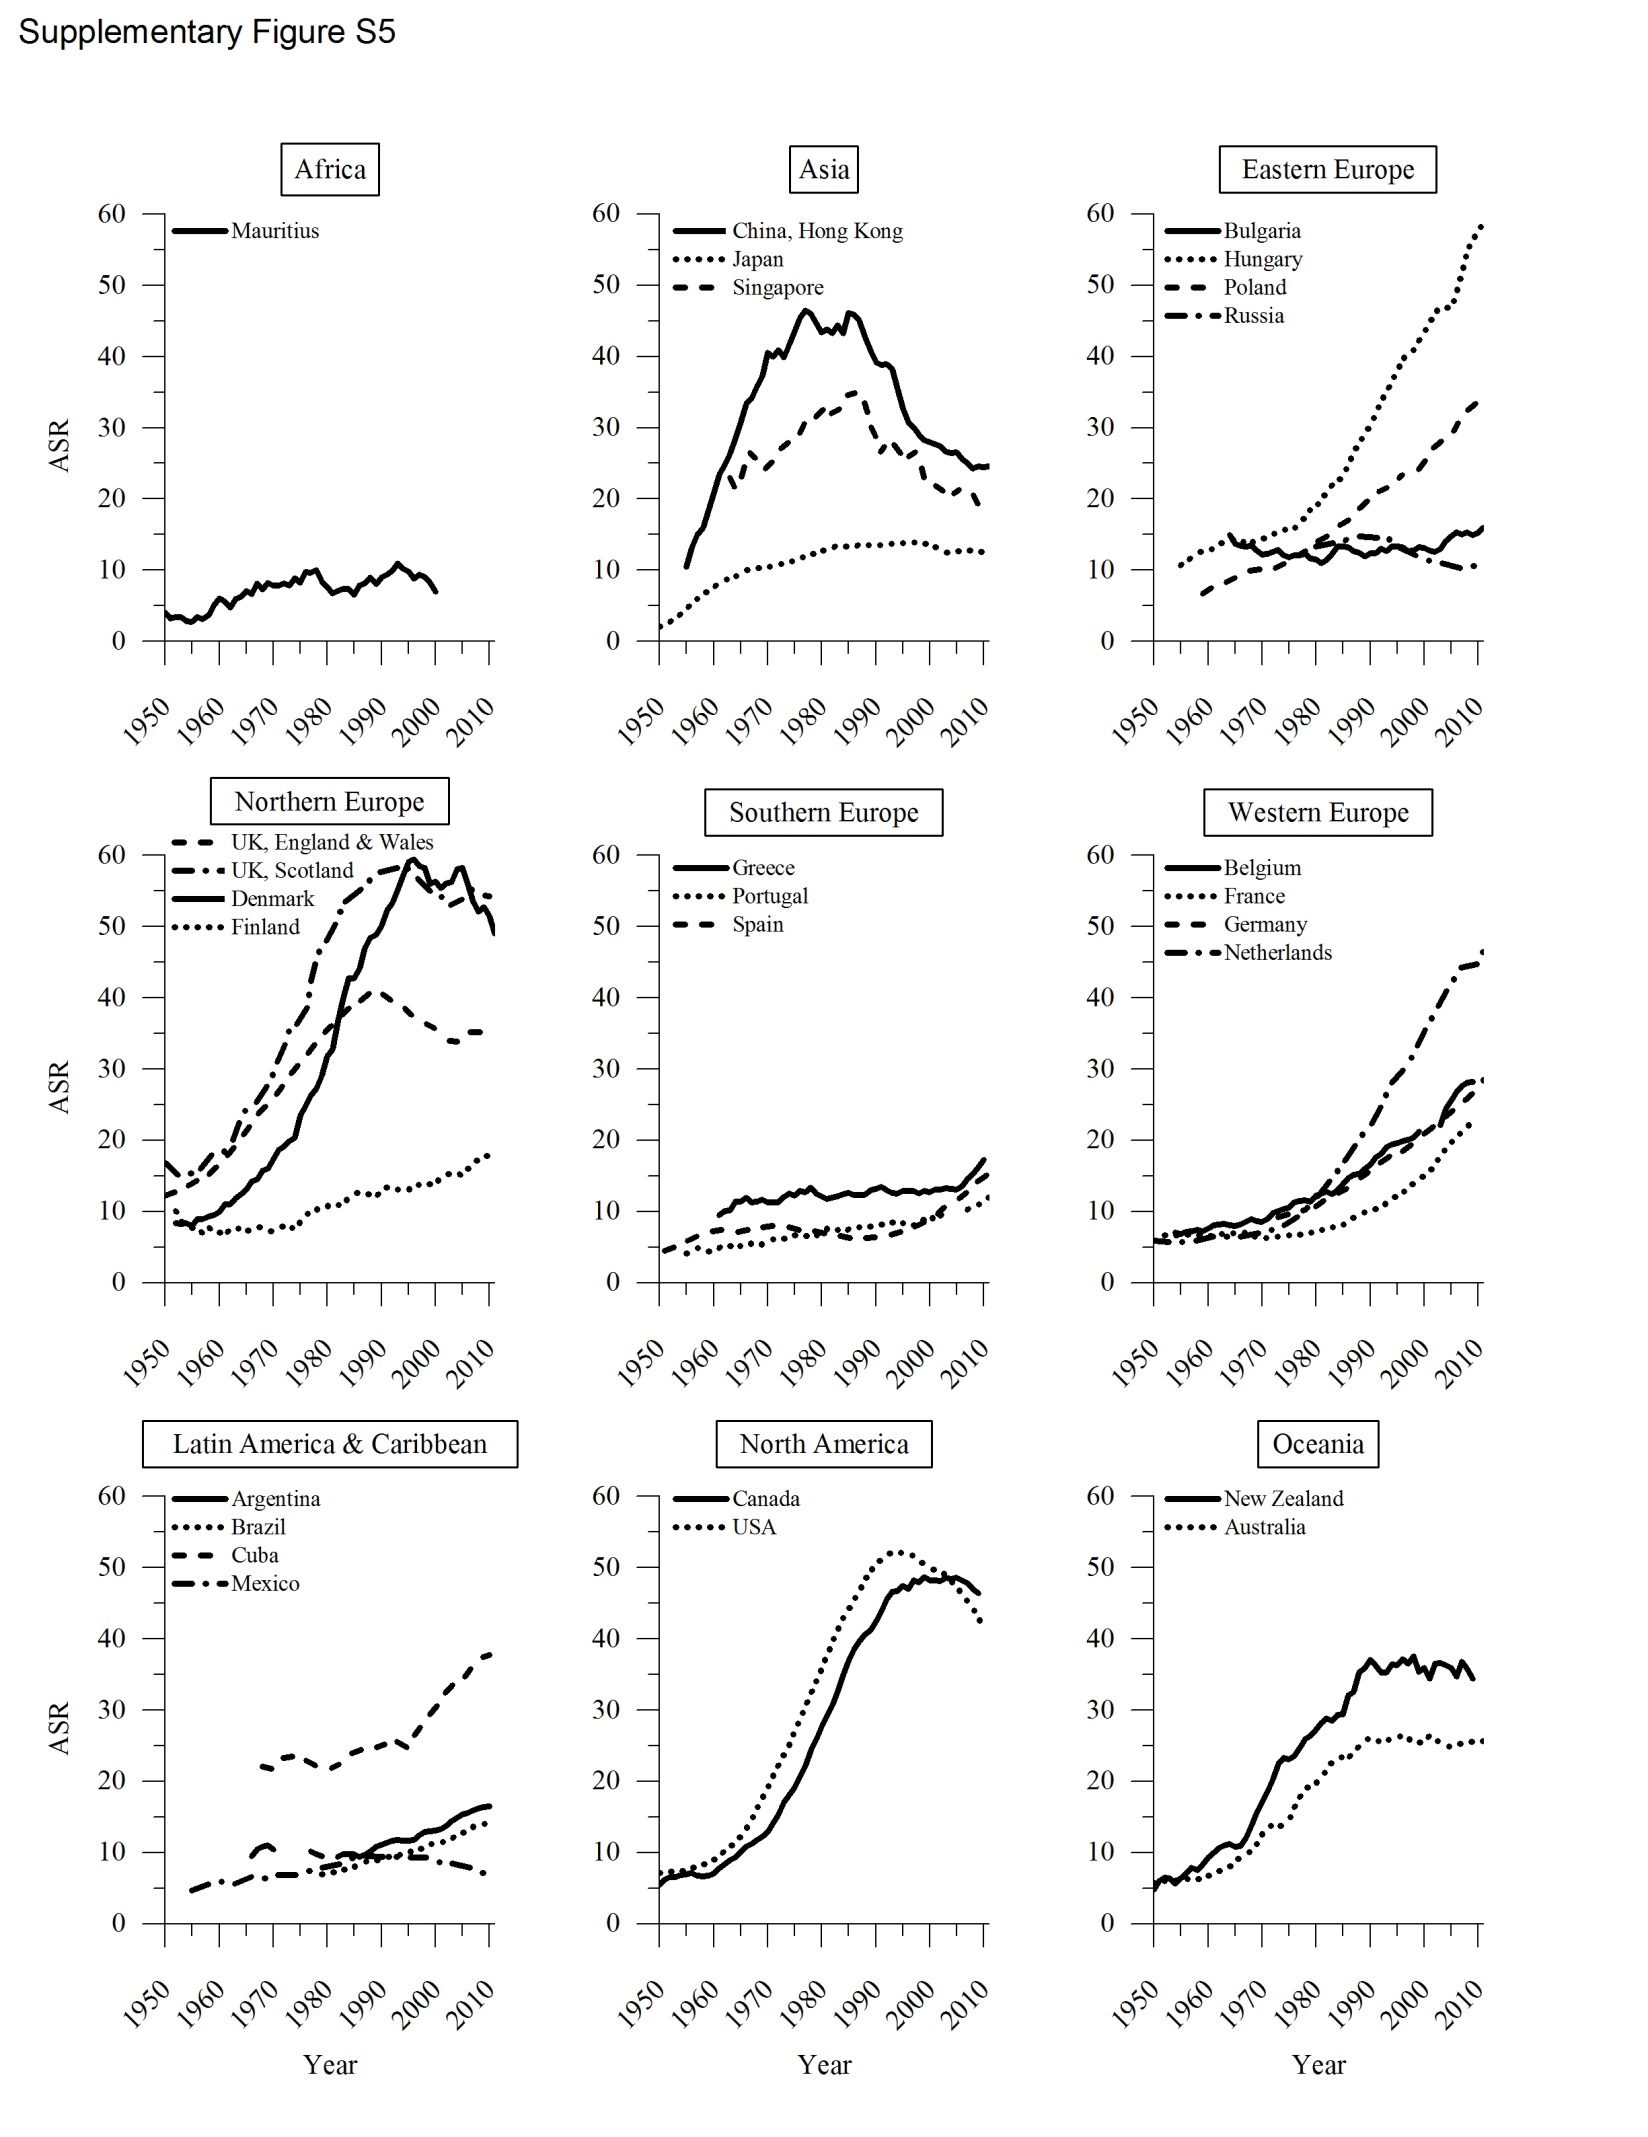
**

**Supplementary Table S1**

|  | Trend 1 | | Trend 2 | | Trend 3 | | Trend 4 | | Trend 5 | | AAPC | |
| --- | --- | --- | --- | --- | --- | --- | --- | --- | --- | --- | --- | --- |
|  | Years | APC | Years | APC | Years | APC | Years | APC | Years | APC | Last five years | |
| **AFRICA** |  |  |  |  |  |  |  |  |  |  |  |  |
| Eastern Africa |  |  |  |  |  |  |  |  |  |  |  |  |
| Mauritius | 1985–2011 | 0.3 |  |  |  |  |  |  |  |  | 2007–2011 | 0.3 |
| Northern Africa |  |  |  |  |  |  |  |  |  |  |  |  |
| Egypt | 2000–2011 | 4.4a |  |  |  |  |  |  |  |  | 2007–2011 | 4.4 a |
| **ASIA** |  |  |  |  |  |  |  |  |  |  |  |  |
| Eastern Asia |  |  |  |  |  |  |  |  |  |  |  |  |
| China, Hong Kong | 1985–2000 | -3.6 a | 2000–2011 | -1.3 a |  |  |  |  |  |  | 2007–2011 | -1.3 a |
| Japan | 1985–2000 | 0.2 a | 2000–2003 | -3.7 a | 2003–2011 | 0.3 |  |  |  |  | 2007–2011 | 0.3 |
| Republic of Korea | 1985–1995 | 7.0 a | 1995–2011 | -1.4 a |  |  |  |  |  |  | 2007–2011 | -1.4 a |
| Central Asia |  |  |  |  |  |  |  |  |  |  |  |  |
| Kazakhstan | 1985–1990 | 3.6 a | 1990–2010 | -3.0 a |  |  |  |  |  |  | 2006–2010 | -3.0 a |
| Kyrgyzstan | 1985–2010 | -0.9 a |  |  |  |  |  |  |  |  | 2006–2010 | -0.9 a |
| Uzbekistan | 1985–2005 | -3.7 a |  |  |  |  |  |  |  |  | 2001–2005 | -3.7 a |
| South-Eastern Asia |  |  |  |  |  |  |  |  |  |  |  |  |
| Philippinesc | 1992–2008 | 1.0 a |  |  |  |  |  |  |  |  | 2000–2008 | 1.0 a |
| Singapore | 1985–2011 | -2.4 a |  |  |  |  |  |  |  |  | 2007–2011 | -2.4 a |
| Western Asia |  |  |  |  |  |  |  |  |  |  |  |  |
| Israel | 1985–2010 | 0.4 a |  |  |  |  |  |  |  |  | 2006–2010 | 0.4 a |
| **EUROPE** |  |  |  |  |  |  |  |  |  |  |  |  |
| Eastern Europe |  |  |  |  |  |  |  |  |  |  |  |  |
| Belarusc | 1985–1992 | 2.0 | 1992–2001 | -3.7 a | 2001–2009 | -0.3 |  |  |  |  | 2002–2009 | -0.3 |
| Bulgaria | 1985–2011 | 0.8 a |  |  |  |  |  |  |  |  | 2007–2011 | 0.8 a |
| Czech Republic | 1986–1995 | 3.1 a | 1995–2011 | 1.1 a |  |  |  |  |  |  | 2007–2011 | 1.1 a |
| Hungary | 1985–1993 | 5.3 a | 1993–2011 | 2.8 a |  |  |  |  |  |  | 2007–2011 | 2.8 a |
| Polandb | 1985–2011 | 2.7 a |  |  |  |  |  |  |  |  | 2007–2011 | 2.7 a |
| Republic of Moldova | 1985–2011 | -1.0 a |  |  |  |  |  |  |  |  | 2007–2011 | -1.0 a |
| Romania | 1985–2011 | 1.4 a |  |  |  |  |  |  |  |  | 2007–2011 | 1.4 a |
| Russian Federation | 1985–1993 | 0.3 | 1993–1996 | -4.7 | 1996–2006 | -2.1 a | 2006–2010 | 1.1 |  |  | 2006–2010 | 1.1 |
| Slovakia | 1992–2006 | 0.7 | 2006–2010 | 6.8 a |  |  |  |  |  |  | 2006–2010 | 6.8 a |
| Ukraineb | 1985–1990 | 1.8 a | 1990–2006 | -2.8 a | 2006–2011 | -0.2 |  |  |  |  | 2006–2011 | -0.2 |
| Northern Europe |  |  |  |  |  |  |  |  |  |  |  |  |
| Denmark | 1985–1995 | 3.4 a | 1995–2011 | -0.9 a |  |  |  |  |  |  | 2007–2011 | -0.9 a |
| Estonia | 1985–2011 | 0.1 |  |  |  |  |  |  |  |  | 2007–2011 | 0.1 |
| Finland | 1985–1999 | 0.7 | 1999–2011 | 2.5 a |  |  |  |  |  |  | 2007–2011 | 2.5 a |
| Iceland | 1985–2009 | 0.1 |  |  |  |  |  |  |  |  | 2005–2009 | 0.1 |
| Ireland | 1985–2010 | -0.4 a |  |  |  |  |  |  |  |  | 2006–2010 | -0.4 a |
| Latvia | 1985–2010 | -0.8 a |  |  |  |  |  |  |  |  | 2006–2010 | -0.8 a |
| Lithuania | 1985–2010 | -0.6 a |  |  |  |  |  |  |  |  | 2006–2010 | -0.6 a |
| Norway | 1985–1997 | 5.3 a | 1997–2011 | 0.8 a |  |  |  |  |  |  | 2007–2011 | 0.8 a |
| Sweden | 1985–2005 | 2.7 a | 2005–2010 | -1.3 |  |  |  |  |  |  | 2006–2010 | -1.3 |
| United Kingdom | 1985–1989 | 1.6 a | 1989–2003 | -1.3 a | 2003–2010 | 0.6 a |  |  |  |  | 2006–2010 | 0.6 a |
| UK, England and Wales | 1985–1989 | 1.4 a | 1989–2003 | -1.4 a | 2003–2010 | 0.6 a |  |  |  |  | 2006–2010 | 0.6 a |
| UK, Northern Ireland | 1985–2010 | 0.5 a |  |  |  |  |  |  |  |  | 2006–2010 | 0.5a |
| UK, Scotland | 1985–1992 | 1.2 a | 1992–2003 | -1.0 a | 2003–2010 | 0.6 |  |  |  |  | 2006–2010 | 0.6 |
| Southern Europe |  |  |  |  |  |  |  |  |  |  |  |  |
| Croatia | 1985–1995 | 0.6 | 1995–2011 | 3.0 a |  |  |  |  |  |  | 2007–2011 | 3.0 a |
| Greece | 1985–2005 | 0.1 | 2005–2010 | 5.5 a |  |  |  |  |  |  | 2006–2010 | 5.5 a |
| Italyb | 1985–1999 | 0.8 a | 1999–2010 | 1.7 a |  |  |  |  |  |  | 2006–2010 | 1.7 a |
| Portugalc | 1985–2011 | 1.7 a |  |  |  |  |  |  |  |  | 2007–2011 | 1.7 a |
| Serbia | 1998–2011 | 4.4 a |  |  |  |  |  |  |  |  | 2007–2011 | 4.4 a |
| Slovenia | 1985–2010 | 2.4 a |  |  |  |  |  |  |  |  | 2006–2010 | 2.4 a |
| Spain | 1985–1995 | 1.4 a | 1995–2011 | 5.1 a |  |  |  |  |  |  | 2007–2011 | 5.1 a |
| TFYR Macedonia | 1991–1999 | 5.8 a | 1999–2002 | -8.7 | 2002–2010 | 5.9 a |  |  |  |  | 2006–2010 | 5.9 a |
| Western Europe |  |  |  |  |  |  |  |  |  |  |  |  |
| Austria | 1985–2011 | 2.2 a |  |  |  |  |  |  |  |  | 2007–2011 | 2.2 a |
| Belgiumc | 1985–2009 | 2.9 a |  |  |  |  |  |  |  |  | 2005–2009 | 2.9 a |
| France | 1985–2009 | 4.4 a |  |  |  |  |  |  |  |  | 2005–2009 | 4.4 a |
| Germany | 1985–1991 | 4.1 a | 1991–2011 | 2.7 a |  |  |  |  |  |  | 2007–2011 | 2.7 a |
| Luxembourg | 1985–2011 | 1.8 a |  |  |  |  |  |  |  |  | 2007–2011 | 1.8 a |
| Netherlands | 1985–1994 | 5.7 a | 1994–2005 | 4.0 a | 2005–2011 | 1.2 a |  |  |  |  | 2007–2011 | 1.2 a |
| Switzerland | 1985–1990 | 1.3 | 1990–1993 | 10.7 | 1993–1996 | -3.6 | 1996–2000 | 5.2 a | 2000–2010 | 1.9 a | 2006–2010 | 1.9 a |

|  | Trend 1 | | Trend 2 | | Trend 3 | | Trend 4 | | Trend 5 | | AAPC | |
| --- | --- | --- | --- | --- | --- | --- | --- | --- | --- | --- | --- | --- |
|  | Years | APC | Years | APC | Years | APC | Years | APC | Years | APC | Years | |
| **LATIN AMERICA AND THE CARIBBEAN** |  |  |  |  |  |  |  |  |  |  |  |  |
| Caribbean |  |  |  |  |  |  |  |  |  |  |  |  |
| Cuba | 1985–1994 | 0.5 | 1994–2010 | 2.7 a |  |  |  |  |  |  | 2006–2010 | 2.7 a |
| Central America |  |  |  |  |  |  |  |  |  |  |  |  |
| Costa Rica | 1985–2009 | -2.4 a |  |  |  |  |  |  |  |  | 2005–2009 | -2.4 a |
| Guatemala | 1986–2008 | 2.7 a |  |  |  |  |  |  |  |  | 2004–2008 | 2.7 a |
| Mexico | 1985–1997 | 0.1 | 1997–2010 | -2.2 a |  |  |  |  |  |  | 2006–2010 | -2.2 a |
| Panamad | 1985–2009 | -0.2 |  |  |  |  |  |  |  |  | 2005–2009 | -0.2 |
| South America |  |  |  |  |  |  |  |  |  |  |  |  |
| Argentina | 1985–2010 | 2.3 a |  |  |  |  |  |  |  |  | 2006–2010 | 2.3 a |
| Brazil | 1985–2010 | 2.3 a |  |  |  |  |  |  |  |  | 2006–2010 | 2.3 a |
| Chile | 1985–2009 | 1.1 a |  |  |  |  |  |  |  |  | 2005–2009 | 1.1 a` |
| Colombia | 1985–2005 | 0.8 a | 2005–2009 | -4.5 a |  |  |  |  |  |  | 2005–2009 | -4.5 a |
| Ecuador | 1985–1995 | 5.4 a | 1995–2010 | 0.0 |  |  |  |  |  |  | 2006–2010 | 0.0 |
| Paraguay | 1995–2009 | 2.2 a |  |  |  |  |  |  |  |  | 2005–2009 | 2.2 a |
| Venezuelab | 1985–2007 | 0.9 a |  |  |  |  |  |  |  |  | 2003–2007 | 0.9 a |
| **NORTHERN AMERICA** |  |  |  |  |  |  |  |  |  |  | – |  |
| Canada | 1985–1996 | 2.3 a | 1996–2009 | -0.2 |  |  |  |  |  |  | 2005–2009 | -0.2 |
| United States of America | 1985–1992 | 2.4 a | 1992–2003 | -0.6 a | 2003–2010 | -2.2 a |  |  |  |  | 2006–2010 | -2.2 a |
| **OCEANIA** |  |  |  |  |  |  |  |  |  |  |  |  |
| Australia | 1985–1989 | 3.2 | 1989–2011 | -0.1 |  |  |  |  |  |  | 2007–2011 | -0.1 |
| New Zealand | 1985–2009 | 0.2 |  |  |  |  |  |  |  |  | 2005–2009 | 0.2 |

APC = Annual Percent Change; AAPC = Average Annual Percent Change

a) The APC or AAPC is statistically different from zero.

b) Time series missing 1-2 years of data (Poland, 1997-1998; Ukraine, 2007; Italy, 2004-2005; Venezuela, 1991, 1995)

c) Time series missing 3-4 years of data (Philippines, 2004-2007; Belarus, 1996, 2004-2006; Portugal, 2004-2006; Belgium, 2000-2002)

d) Time series missing 5+ years of data (Panama, 1990-1995)
